# Supplementary material for: Total syntheses of Kavaratamide A and 5- epi -Kavaratamide A
Source: Royal Society of Chemistry journal article supplement (doi:10.1039/d4ob01409j), 2024-11-26

# Supporting Information

## Total syntheses of Kavaratamide A and 5-epi-Kavaratamide A

Tieshun Ren<sup>a</sup>, Ke Lv<sup>b</sup>, Fangzhong Hu<sup>\*b</sup>, Yue Chen<sup>\*a,b, c</sup>,

<sup>a</sup>State Key Laboratory of Medicinal Chemical Biology, College of Pharmacy, Nankai University, Tianjin 300350, People's Republic of China

<sup>b</sup>State Key Laboratory and Institute of Elemento-Organic Chemistry, Nankai University, Tianjin 300071, People's Republic of China

<sup>c</sup>Frontiers Science Center for New Organic Matter, Haihe Laboratory of Sustainable Chemical Transformations, Nankai University, Tianjin 300071, People's Republic of China

Emails: fzhu@nankai.edu.cn, yuechen@nankai.edu.cn

### Table of Contents

|                                                                                   |            |
|-----------------------------------------------------------------------------------|------------|
| <b>1. General information.....</b>                                                | <b>S2</b>  |
| <b>2. General routing.....</b>                                                    | <b>S2</b>  |
| <b>3. General procedure.....</b>                                                  | <b>S4</b>  |
| <b>4. Cytotoxicity Assays.....</b>                                                | <b>S17</b> |
| <b>5. Comparison of the Spectra of Isolated and Synthetic Compounds<br/>.....</b> | <b>S18</b> |
| <b>6. The copies of <sup>1</sup>H and <sup>13</sup>C NMR.....</b>                 | <b>S20</b> |

## 1. General information

All reagents were purchased from commercial suppliers and could be used without purification. All solvents were obtained from commercial sources and purified according to standard procedures. For thin-layer chromatography, a silica gel plate (GF254) was used. The reaction products were purified by column chromatography using silica gel (200-300 mesh). Mass spectrometry was performed using Electrospray Ionization (ESI). NMR spectra were recorded on Bruker-400 NMR spectrometers with tetramethylsilane as the internal standard in CDCl<sub>3</sub> or DMSO-D<sub>6</sub>) (<sup>1</sup>H at 400MHz and <sup>13</sup>C at 101MHz). All chemical shifts  $\delta$  are in ppm. The chemical shift ( $\delta$  ppm) is related to the resonance of the deuterated solvent as the internal references (CDCl<sub>3</sub>  $\delta_{\text{H}}$  = 7.26 ppm,  $\delta_{\text{C}}$  = 77.16 ppm, DMSO-D<sub>6</sub>  $\delta_{\text{H}}$  = 2.50 ppm,  $\delta_{\text{C}}$  = 39.60 ppm).

## 2. General routing

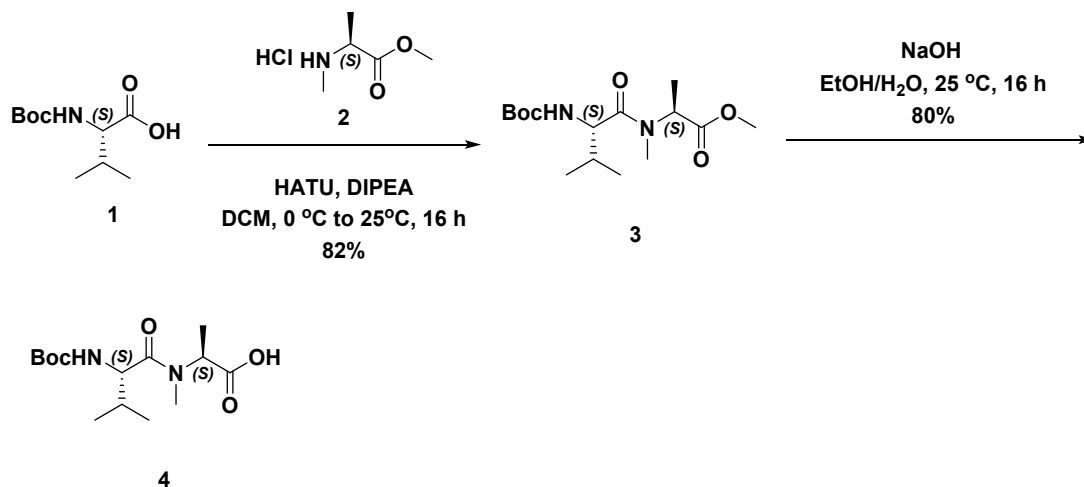

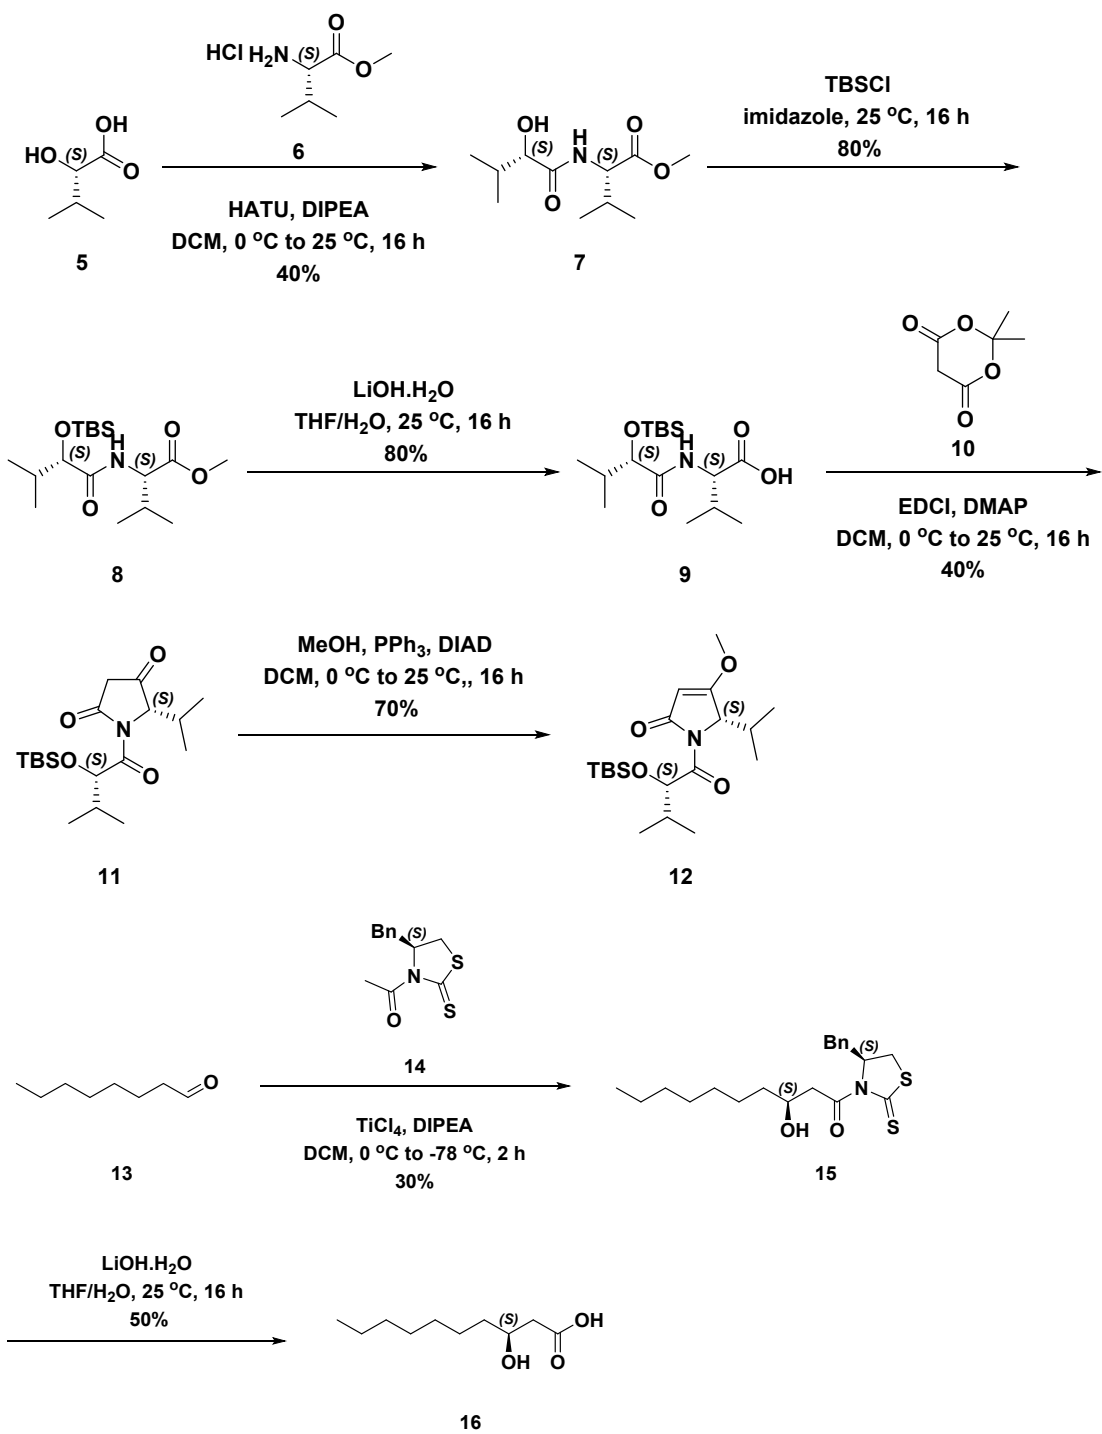

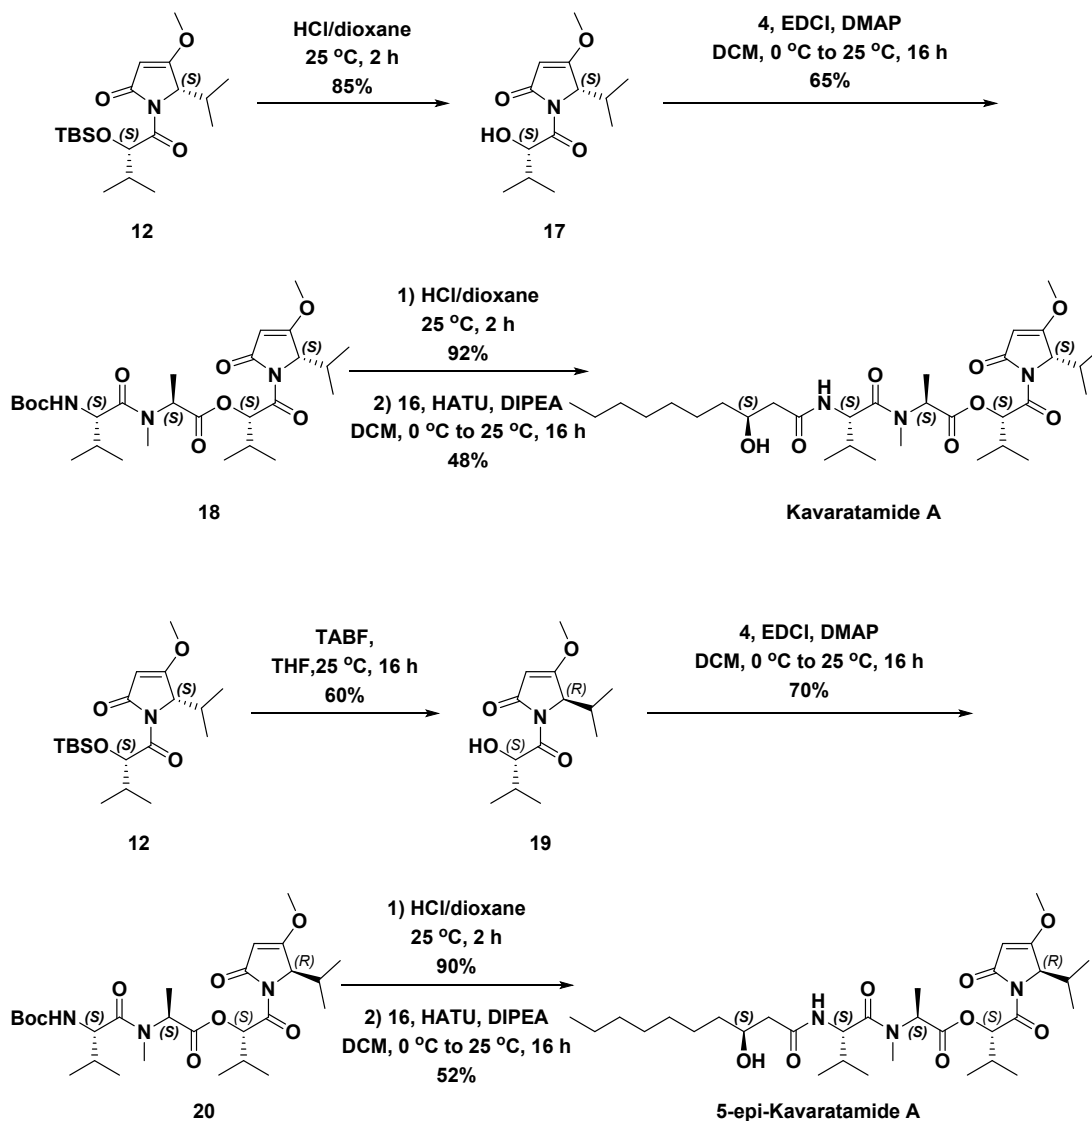

### 3. General procedure

#### 3.1 General procedure for the synthesis of 3

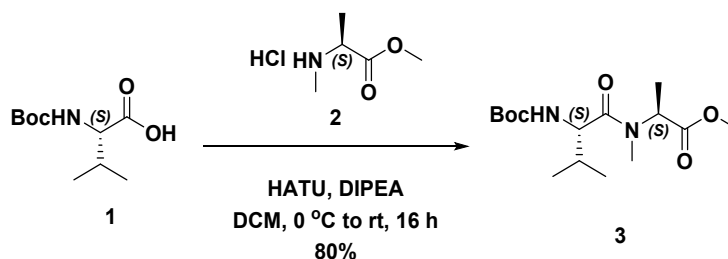

To a solution of compound 1 (1.00 g, 4.60 mmol, 1.0 eq), compound 2 (0.71 g, 4.60 mmol, 1.0 eq) and DIPEA (1.49 g, 11.51 mmol, 2.5 eq) in DCM (10 ml) was added HATU (2.28 g, 5.98 mmol, 1.3 eq) at 0 °C under N<sub>2</sub>. The resulting solution was stirred

at 25°C under N<sub>2</sub> for 16 hours. Water (20 ml) was added to above solution at 0°C, extracted with EtOAc (30 ml) three times. The organic layers was combined, washed with brine (10 ml), dried over Na<sub>2</sub>SO<sub>4</sub>, filtrated and concentrated to afford a crude product, purified by silica gel column (PE : EtOAc = 5:1) to afford compound **3** (1.20 g, 82.2% yield). [ $\alpha$ ]<sub>25</sub> D= −48.5 (c = 0.1, MeOH). <sup>1</sup>H NMR (400 MHz, CDCl<sub>3</sub>)  $\delta$  5.26 (dt, *J* = 10.3, 4.8 Hz, 2H), 4.47 (p, *J* = 4.3, 3.8 Hz, 1H), 3.70 (d, *J* = 3.5 Hz, 3H), 3.01 (d, *J* = 3.3 Hz, 3H), 2.01 (dt, *J* = 12.3, 6.0 Hz, 1H), 1.42 (t, *J* = 4.7 Hz, 12H), 0.95 (ddd, *J* = 36.7, 7.0, 3.4 Hz, 6H). <sup>13</sup>C NMR (101 MHz, CDCl<sub>3</sub>)  $\delta$  171.7, 171.0, 154.9, 78.5, 76.2, 54.2, 51.2, 51.1, 30.3, 30.3, 27.3, 27.3, 18.4, 16.2, 13.1. HRMS(ES<sup>+</sup>): *m/z* Found: 339.1893 [M+Na]<sup>+</sup>, Calcd.: 339.1890.

### 3.2 General procedure for the synthesis of **4**

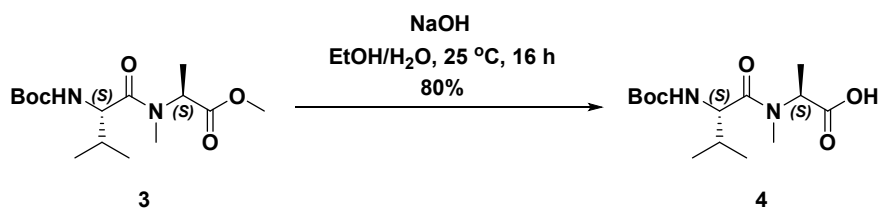

To a solution of compound **3** (400.00 mg, 1.26 mmol, 1.0 eq) in EtOH (3 ml) and H<sub>2</sub>O (1 ml) was added NaOH (75.85 mg, 1.90 mmol, 1.5 eq) at 0°C under N<sub>2</sub>. The resulting solution was stirred at 25°C under N<sub>2</sub> for 16 hours. The solution was concentrated and NH<sub>4</sub>Cl (aq) (10 ml) was added to above mixture, and the resulting mixture was extracted with EtOAc (50 ml) three times. The organic layer was combined, washed with brine (20 ml), dried over Na<sub>2</sub>SO<sub>4</sub>, filtrated and concentrated to afford crude product, purified by silica gel column (DCM: MeOH = 10:1) to afford compound **4** (306.00 mg, 80.0% yield). [ $\alpha$ ]<sub>25</sub> D= −63.8 (c = 0.1, MeOH). <sup>1</sup>H NMR (400 MHz, CDCl<sub>3</sub>)  $\delta$  5.47 (d, *J* = 9.4 Hz, 1H), 5.25 (d, *J* = 7.4 Hz, 1H), 4.48 (t, *J* = 8.2 Hz, 1H), 3.05 (s, 3H), 1.99 (dp, *J* = 14.7, 7.3 Hz, 1H), 1.43 (d, *J* = 5.4 Hz, 12H), 1.04 – 0.96 (m, 3H), 0.90 (d, *J* = 6.8 Hz, 3H). <sup>13</sup>C NMR (101 MHz, CDCl<sub>3</sub>)  $\delta$  175.3, 173.3, 156.0, 79.6, 77.2, 55.3, 52.3, 31.6, 31.2, 28.3, 28.3, 19.3, 17.3, 14.0. HRMS(ES<sup>+</sup>): *m/z* Found: 325.1736 [M+Na]<sup>+</sup>, Calcd.: 325.1734.

### 3.3 General procedure for the synthesis of 7

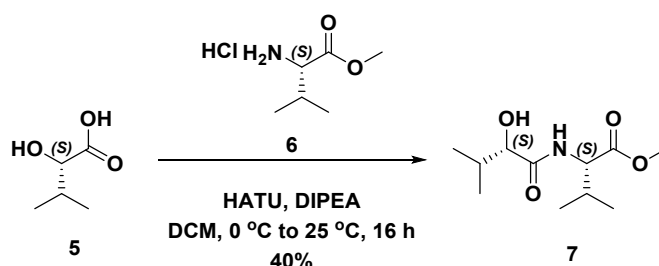

To a solution of compound **5** (2.00 g, 16.94 mmol, 1.0 eq), compound **6** (2.12 g, 18.62 mmol, 1.1 eq) and DIPEA (5.48 g, 42.32 mmol, 2.5 eq) in DCM (20 ml) was added HATU (8.36 g, 22.00 mmol, 1.3 eq) at 0°C under N<sub>2</sub>. The resulting solution was stirred at 25°C under N<sub>2</sub> for 16 hours. Water (40 ml) was added to above solution at 0°C, extracted with EtOAc (60 ml) three times. The organic layers was combined, washed with brine (10 ml), dried over Na<sub>2</sub>SO<sub>4</sub>, filtrated and concentrated to afford a crude product, purified by silica gel column (PE : EtOAc = 3:1) to afford compound **7** (1.60 g, 40.8% yield). [ $\alpha$ ]<sub>25</sub> D = -36.3 (c = 0.1, MeOH). <sup>1</sup>H NMR (400 MHz, CDCl<sub>3</sub>)  $\delta$  7.22 (d, *J* = 8.9 Hz, 1H), 4.42 (dt, *J* = 8.8, 4.3 Hz, 1H), 4.19 (dd, *J* = 13.1, 7.2 Hz, 1H), 3.90 (d, *J* = 5.0 Hz, 1H), 3.64 (d, *J* = 3.8 Hz, 3H), 2.70 (d, *J* = 3.4 Hz, 1H), 2.08 (dt, *J* = 12.9, 6.6 Hz, 2H), 0.95 – 0.71 (m, 12H). <sup>13</sup>C NMR (101 MHz, CDCl<sub>3</sub>)  $\delta$  174.0, 172.4, 76.1, 56.7, 52.0, 31.6, 31.0, 19.0, 19.0, 17.7, 15.6. HRMS(ES<sup>+</sup>): *m/z* Found: 254.1365 [M+Na]<sup>+</sup>, Calcd.: 254.1363.

### 3.4 General procedure for the synthesis of 8

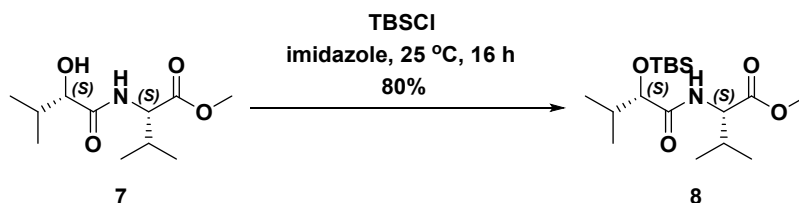

To a solution of compound **7** (1.20 g, 5.19 mmol, 1.0 eq) and imidazole (0.53 g, 7.78 mmol, 1.5 eq) in DCM (15 ml) was added TBSCl (1.17 g, 7.78 mmol, 1.5 eq) at 25°C under N<sub>2</sub>. The resulting solution was stirred at 25°C under N<sub>2</sub> for 16 hours. Water (20 ml) was added to above solution at 0°C, extracted with EtOAc (30 ml) three times. The organic layers were combined, washed with brine (10 ml), dried over Na<sub>2</sub>SO<sub>4</sub>, filtrated

and concentrated to afford a crude product, purified by silica gel column (PE : EtOAc = 5:1) to afford compound **8** (1.43 g, 80.0% yield).  $[\alpha]_{25}^D = -32.8$  ( $c = 0.1$ , MeOH).  $^1\text{H}$  NMR (400 MHz,  $\text{CDCl}_3$ )  $\delta$  7.00 (d,  $J = 9.2$  Hz, 1H), 4.51 (dt,  $J = 8.8, 3.8$  Hz, 1H), 3.95 (d,  $J = 3.4$  Hz, 1H), 3.68 (d,  $J = 3.0$  Hz, 3H), 2.25 – 2.03 (m, 2H), 0.94 (d,  $J = 3.1$  Hz, 9H), 0.94 – 0.82 (m, 12H), 0.06 (d,  $J = 3.1$  Hz, 6H).  $^{13}\text{C}$  NMR (101 MHz,  $\text{CDCl}_3$ )  $\delta$  173.0, 171.9, 77.7, 56.5, 51.9, 32.7, 31.2, 25.7, 19.3, 19.0, 18.0, 17.7, 16.2, -5.0, -5.3. HRMS( $\text{ES}^+$ ):  $m/z$  Found: 368.2229  $[\text{M}+\text{Na}]^+$ , Calcd.: 368.2228.

### 3.5 General procedure for the synthesis of **9**

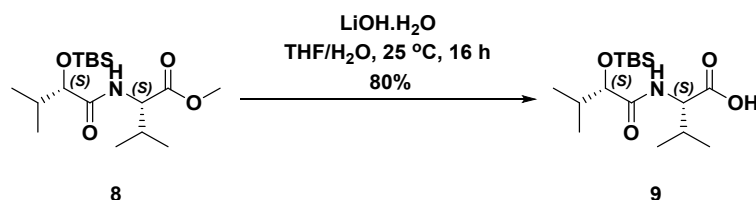

To a solution of compound **8** (1.40 g, 4.05 mmol, 1.0 eq) in THF (15 ml) and  $\text{H}_2\text{O}$  (3 ml) was added  $\text{LiOH}\cdot\text{H}_2\text{O}$  (0.25 g, 6.08 mmol, 1.5 eq) at  $25^\circ\text{C}$  under  $\text{N}_2$ . The resulting solution was stirred at  $25^\circ\text{C}$  under  $\text{N}_2$  for 16 hours. The solution was concentrated to afford crude product,  $\text{NH}_4\text{Cl}$  (aq) (10 ml) was added to above mixture, extracted with EtOAc (20 ml) three times. The organic layers was combined, washed with brine (10 ml), dried over  $\text{Na}_2\text{SO}_4$ , filtrated and concentrated to afford a crude product, purified by silica gel column (DCM : MeOH = 10:1) to afford compound **9** (1.24 g, 72.0% yield).  $[\alpha]_{25}^D = -48.3$  ( $c = 0.1$ , MeOH).  $^1\text{H}$  NMR (400 MHz,  $\text{CDCl}_3$ )  $\delta$  10.03 (s, 1H), 7.13 (d,  $J = 9.1$  Hz, 1H), 4.59 (dd,  $J = 9.1, 4.2$  Hz, 1H), 4.04 (d,  $J = 3.1$  Hz, 1H), 2.26 (td,  $J = 6.9, 4.2$  Hz, 1H), 2.12 (s, 1H), 0.96 (d,  $J = 6.3$  Hz, 18H), 0.88 (d,  $J = 6.9$  Hz, 3H), 0.07 (d,  $J = 7.0$  Hz, 6H).  $^{13}\text{C}$  NMR (101 MHz,  $\text{CDCl}_3$ )  $\delta$  175.5, 174.0, 77.4, 56.4, 32.6, 31.1, 25.8, 19.4, 19.1, 18.0, 17.5, 16.1, -5.0, -5.2. HRMS( $\text{ES}^+$ ):  $m/z$  Found: 354.2070  $[\text{M}+\text{Na}]^+$ , Calcd.: 354.2071.

### 3.6 General procedure for the synthesis of **11**

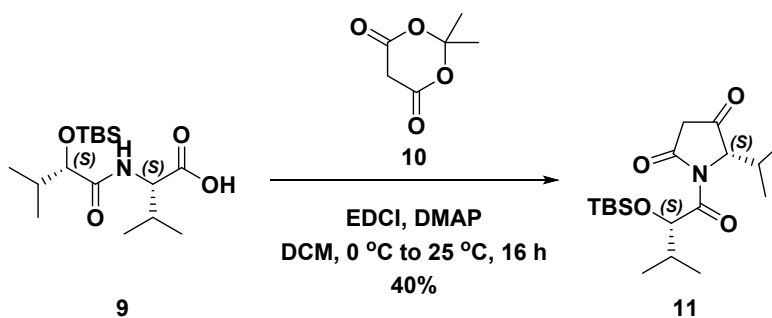

To a solution of compound **9** (500.00 mg, 1.51 mmol, 1.0 eq) and compound **10** (239.10 mg, 1.66 mmol, 1.1 eq) in DCM (10 ml) was added EDCI (346.94 mg, 1.81 mmol, 1.2 eq) at 0°C under N<sub>2</sub>. The resulting solution was stirred at 0°C under N<sub>2</sub> for 2 hours. Then a solution of DMAP (202.68 mg, 1.66 mmol, 1.1 eq) in DCM (2 ml) was added dropwise above solution at 0°C under N<sub>2</sub>. The resulting solution was stirred at 25°C under N<sub>2</sub> for 16 hours. Water (20 ml) was added to above solution at 0°C, extracted with EtOAc (30 ml) three times. The organic layers was combined, washed with brine (10 ml), dried over Na<sub>2</sub>SO<sub>4</sub>, filtrated and concentrated to afford a crude product, purified by silica gel column (DCM : MeOH = 10:1) to afford compound **11** (214.50 mg, 40.0 % yield).  $[\alpha]_{25}^D = -38.5$  (c = 0.1, MeOH). <sup>1</sup>H NMR (400 MHz, CDCl<sub>3</sub>) δ 5.30 – 5.21 (m, 1H), 4.65 – 4.42 (m, 1H), 3.19 (d, *J* = 5.2 Hz, 2H), 2.75 – 2.50 (m, 1H), 2.10 – 1.92 (m, 1H), 1.14 (d, *J* = 7.0 Hz, 3H), 0.92 (d, *J* = 6.4 Hz, 18H), 0.04 (d, *J* = 11.2 Hz, 6H). <sup>13</sup>C NMR (101 MHz, CDCl<sub>3</sub>) δ 203.2, 202.9, 174.7, 174.4, 169.5, 168.9, 77.3, 76.9, 71.8, 71.1, 44.8, 44.7, 32.4, 31.6, 30.0, 29.6, 25.9, 25.8, 25.8, 25.7, 20.3, 19.9, 18.3, 18.3, 16.0, 15.9, 15.4, 15.0, -4.8, -5.3. HRMS(ES<sup>+</sup>): *m/z* Found: 378.2070 [M+Na]<sup>+</sup>, Calcd.: 378.2071.

### 3.7 General procedure for the synthesis of **12**

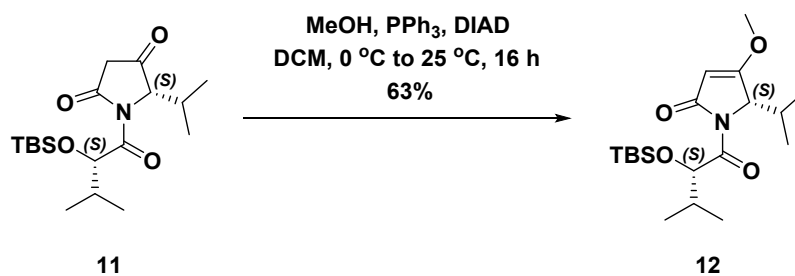

To a solution of compound **11** (200.00 mg, 0.56 mmol, 1.0 eq), PPh<sub>3</sub> (191.80 mg, 0.73





EtOAc (5 ml) three times. The organic layers was combined, washed with brine (3 ml), dried over Na<sub>2</sub>SO<sub>4</sub>, filtrated and concentrated to afford a crude product, purified by silica gel column (PE : EtOAc = 3:1) to afford compound **15** (45.50 mg, 30.1% yield).  $[\alpha]_{25}^D = +78.6$  (*c* = 0.1, MeOH). <sup>1</sup>H NMR (400 MHz, CDCl<sub>3</sub>)  $\delta$  7.36 – 7.28 (m, 2H), 7.27 – 7.20 (m, 3H), 5.36 (ddd, *J* = 10.9, 7.3, 3.8 Hz, 1H), 4.32 – 4.07 (m, 1H), 4.04 – 3.72 (m, 1H), 3.61 (dd, *J* = 17.9, 2.5 Hz, 1H), 3.36 (dt, *J* = 13.9, 6.9 Hz, 1H), 3.19 (dd, *J* = 13.2, 3.9 Hz, 1H), 3.14 – 2.95 (m, 2H), 2.88 (t, *J* = 10.3 Hz, 1H), 1.71 – 1.27 (m, 12H), 0.84 (d, *J* = 7.1 Hz, 3H). <sup>13</sup>C NMR (101 MHz, CDCl<sub>3</sub>)  $\delta$  201.4, 174.1, 173.4, 136.4, 129.4, 129.0, 129.0, 127.3, 72.1, 68.3, 67.9, 46.6, 45.9, 44.6, 36.8, 36.4, 32.1, 31.8, 31.8, 29.6, 29.5, 29.2, 25.6, 22.7, 22.7, 14.1. HRMS(ES<sup>+</sup>): *m/z* Found: 402.1530 [M+Na]<sup>+</sup>, Calcd.: 402.1532.

### 3.9 General procedure for the synthesis of 16

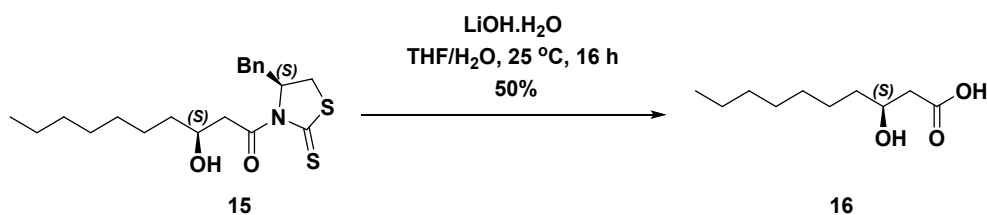

To a solution of compound **15** (40.00 mg, 0.11 mmol, 1.0 eq) in THF (1 ml) and H<sub>2</sub>O (0.3 ml) was added LiOH.H<sub>2</sub>O (6.63 mg, 0.16 mmol, 1.5 eq) at 25°C under N<sub>2</sub>. The resulting solution was stirred at 25°C under N<sub>2</sub> for 16 hours. The solution was concentrated to afford crude product, NH<sub>4</sub>Cl (aq) (3 ml) was added to above mixture, extracted with EtOAc (5 ml) three times. The organic layers was combined, washed with brine (3 ml), dried over Na<sub>2</sub>SO<sub>4</sub>, filtrated and concentrated to afford a crude product, purified by silica gel column (DCM : MeOH = 10:1) to afford compound **16** (10.00 mg, 50.4% yield).  $[\alpha]_{25}^D = +32.5$  (*c* = 0.1, MeOH). <sup>1</sup>H NMR (400 MHz, CDCl<sub>3</sub>)  $\delta$  4.03 (dt, *J* = 8.3, 4.4 Hz, 1H), 2.64 – 2.44 (m, 2H), 1.62 – 1.28 (m, 12H), 0.87 (d, *J* = 7.0 Hz, 3H). <sup>13</sup>C NMR (101 MHz, CDCl<sub>3</sub>)  $\delta$  176.4, 68.0, 40.8, 36.5, 31.8, 29.4, 29.2, 25.4, 22.6, 14.1. HRMS(ES<sup>+</sup>): *m/z* Found: 187.1337 [M-H]<sup>-</sup>, Calcd.: 187.1340.

### 3.10 General procedure for the synthesis of 17

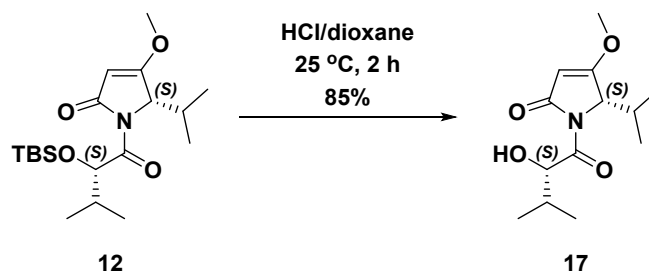

A solution of compound **12** (150.00 mg, 0.41 mmol, 1 eq) in HCl/ dioxane (4 N) (2 ml) was stirred at 25°C under N<sub>2</sub> for 2 h. The mixture was concentrated to afford a hydrochloride compound **17** (88.00 mg, 84.9% yield). The product would be used to next step without further purification.  $[\alpha]_{25}^D = -36.4$  ( $c = 0.1$ , MeOH). <sup>1</sup>H NMR (400 MHz, CDCl<sub>3</sub>)  $\delta$  5.09 (s, 1H), 4.75 (d,  $J = 3.8$  Hz, 1H), 4.53 (d,  $J = 2.6$  Hz, 1H), 3.86 (s, 3H), 2.73 – 2.63 (m, 1H), 2.20 – 2.07 (m, 1H), 1.12 (d,  $J = 7.1$  Hz, 3H), 1.06 (d,  $J = 6.7$  Hz, 3H), 0.85 (d,  $J = 6.8$  Hz, 3H), 0.75 (d,  $J = 6.9$  Hz, 3H). HRMS(ES<sup>+</sup>):  $m/z$  Found: 278.1373 [M+Na]<sup>+</sup>, Calcd.: 278.1363.

### 3.11 General procedure for the synthesis of 18

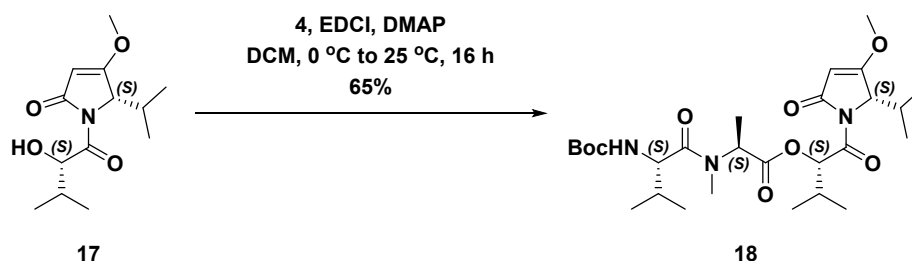

To a solution of compound **17** (35.00 mg, 0.14 mmol, 1.0 eq) and compound **4** (53.89 mg, 0.18 mmol, 1.3 eq) in DCM (2 ml) was added EDCI (39.42 mg, 0.21 mmol, 1.5 eq) at 0°C under N<sub>2</sub>. The resulting solution was stirred at 0°C under N<sub>2</sub> for 30 mins. Then a solution of DMAP (3.35 mg, 0.027 mmol, 0.2 eq) in DCM (1 ml) was added dropwise above solution at 0°C under N<sub>2</sub>. The resulting solution was stirred at 25°C under N<sub>2</sub> for 16 hours. Water (3 ml) was added to above solution at 0°C, extracted with EtOAc (5 ml) three times. The organic layers was combined, washed with brine (3 ml), dried over Na<sub>2</sub>SO<sub>4</sub>, filtrated and concentrated to afford a crude product, purified by

silica gel column (PE : EtOAc = 1:1) to afford compound **18** (48.00 mg, 64.9 % yield).  $[\alpha]_{25}^D = -22.5$  ( $c = 0.5$ , MeOH).  $^1\text{H}$  NMR (400 MHz,  $\text{CDCl}_3$ )  $\delta$  5.80 (d,  $J = 3.2$  Hz, 1H), 5.29 (t,  $J = 7.8$  Hz, 2H), 5.06 (s, 1H), 4.48 (dd,  $J = 7.3, 2.7$  Hz, 2H), 3.84 (s, 3H), 3.06 (d,  $J = 34.4$  Hz, 3H), 2.58 (ddt,  $J = 11.9, 7.5, 4.5$  Hz, 1H), 2.21 (pd,  $J = 6.8, 3.1$  Hz, 1H), 1.99 (dq,  $J = 12.8, 6.6$  Hz, 1H), 1.43 (d,  $J = 10.9$  Hz, 12H), 1.08 (d,  $J = 7.2$  Hz, 3H), 1.04 (d,  $J = 6.9$  Hz, 3H), 0.99 (d,  $J = 6.9$  Hz, 3H), 0.90 (dd,  $J = 11.1, 6.6$  Hz, 6H), 0.77 (d,  $J = 6.9$  Hz, 3H).  $^{13}\text{C}$  NMR (101 MHz,  $\text{CDCl}_3$ )  $\delta$  179.8, 172.4, 171.1, 170.0, 169.0, 155.9, 94.6, 79.4, 78.2, 64.2, 58.5, 55.1, 52.5, 31.8, 31.3, 28.7, 28.3, 19.7, 19.5, 18.7, 17.1, 16.0, 15.2, 14.1. HRMS( $\text{ES}^+$ ):  $m/z$  Found: 562.3105  $[\text{M}+\text{H}]^+$ , Calcd.: 562.3099.

### 3.12 General procedure for the synthesis of Kavaratamide A

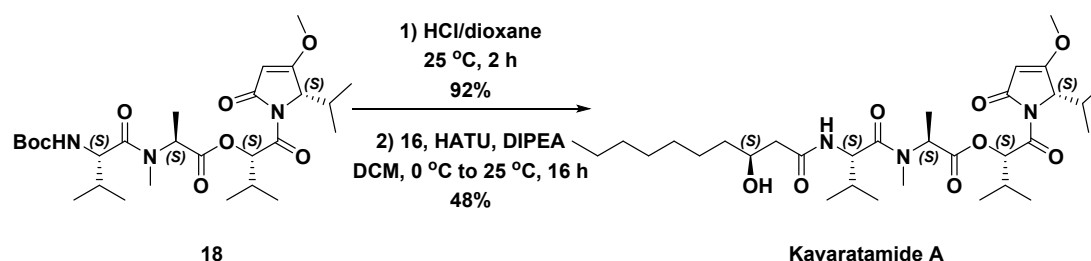

A solution of compound **18** (15.00 mg, 0.028 mmol, 1.0 eq) in HCl/ dioxane (4 N) (1 ml) was stirred at 25°C under  $\text{N}_2$  for 2 h. The mixture was concentrated to afford a hydrochloride compound **18a** (12.20 mg, 92.2% yield). The product would be used to next step without further purification. To a solution of compound **18a** (12.20 mg, 0.026 mmol, 1.0 eq), compound **16** (5.31 mg, 0.028 mmol, 1.1 eq) and DIPEA (8.28 mg, 0.064 mmol, 2.5 eq) in DCM (1 ml) was added HATU (14.62 mg, 0.038 mmol, 1.5 eq) at 0°C under  $\text{N}_2$ . The resulting solution was stirred at 25°C under  $\text{N}_2$  for 16 hours. Water (2 ml) was added to above solution at 0°C, extracted with EtOAc (4 ml) three times. The organic layers was combined, washed with brine (3 ml), dried over  $\text{Na}_2\text{SO}_4$ , filtrated and concentrated to afford a crude product, purified by silica gel column (PE : EtOAc = 1:1) to afford **Kavaratamide A** (7.50 mg, 48.0% yield).  $[\alpha]_{25}^D = -12.5$  ( $c = 1.0$ , MeOH). IR (KBr)  $\nu_{\text{max}}$ : 3309, 2962, 2928, 2855, 1731, 1696, 1630, 1456, 1398, 1342, 1319, 1251, 1212, 1125, 1092, 1007, 943, 832, 703, 665  $\text{cm}^{-1}$ .  $^1\text{H}$  NMR (400



### 3.14 General procedure for the synthesis of *S*-Mosher ester

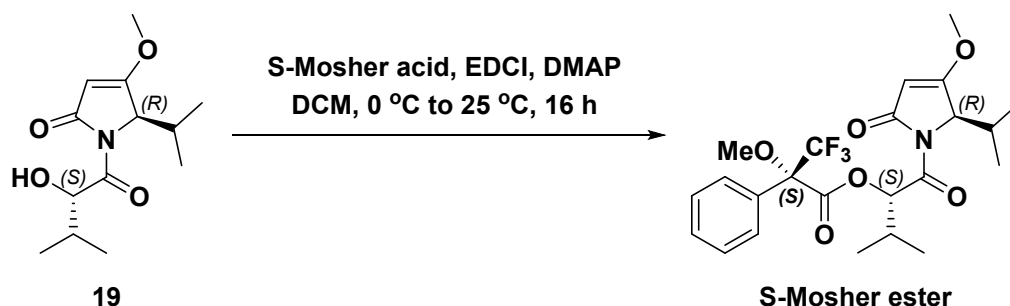

To a solution of compound **19** (5.00 mg, 0.019 mmol, 1.0 eq) and *S*-Mosher acid (5.04 mg, 0.021 mmol, 1.1 eq) in DCM (1 ml) was added EDCI (5.63 mg, 0.029 mmol, 1.5 eq) at 0°C under N<sub>2</sub>. The resulting solution was stirred at 0°C under N<sub>2</sub> for 30 mins. Then a solution of DMAP (0.48 mg, 0.004 mmol, 0.2 eq) in DCM (0.5 ml) was added dropwise above solution at 0°C under N<sub>2</sub>. The resulting solution was stirred at 25°C under N<sub>2</sub> for 6 hours. Water (3 ml) was added to above solution at 0°C, extracted with EtOAc (5 ml) three times. The organic layers was combined, washed with brine (3 ml), dried over Na<sub>2</sub>SO<sub>4</sub>, filtrated and concentrated to afford a crude product, purified by silica gel column (PE : EtOAc = 1:1) to afford **S-Mosher ester** (6.00 mg, 65.0 % yield). <sup>1</sup>H NMR (400 MHz, CDCl<sub>3</sub>) δ 7.69 (dd, *J* = 6.6, 2.9 Hz, 2H), 7.41 (dd, *J* = 5.3, 2.0 Hz, 3H), 6.07 (d, *J* = 3.0 Hz, 1H), 5.10 (s, 1H), 4.68 (d, *J* = 2.8 Hz, 1H), 3.87 (s, 3H), 3.67 (d, *J* = 1.3 Hz, 3H), 2.50 (qt, *J* = 7.0, 3.5 Hz, 1H), 2.36 (pd, *J* = 6.8, 2.9 Hz, 1H), 1.13 (d, *J* = 7.1 Hz, 3H), 0.98 (d, *J* = 6.9 Hz, 3H), 0.89 (d, *J* = 6.9 Hz, 3H), 0.75 (d, *J* = 6.9 Hz, 3H).

### 3.15 General procedure for the synthesis of *R*-Mosher ester

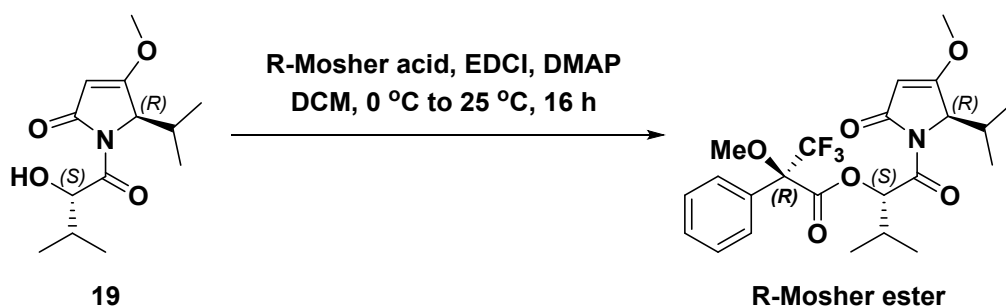

To a solution of compound **19** (5.00 mg, 0.019 mmol, 1.0 eq) and R-Mosher acid (5.04 mg, 0.021 mmol, 1.1 eq) in DCM (1 ml) was added EDCI (5.63 mg, 0.029 mmol, 1.5 eq) at 0°C under N<sub>2</sub>. The resulting solution was stirred at 0°C under N<sub>2</sub> for 30 mins. Then a solution of DMAP (0.48 mg, 0.004 mmol, 0.2 eq) in DCM (0.5 ml) was added dropwise above solution at 0°C under N<sub>2</sub>. The resulting solution was stirred at 25°C under N<sub>2</sub> for 6 hours. Water (3 ml) was added to above solution at 0°C, extracted with EtOAc (5 ml) three times. The organic layers was combined, washed with brine (3 ml), dried over Na<sub>2</sub>SO<sub>4</sub>, filtrated and concentrated to afford a crude product, purified by silica gel column (PE : EtOAc = 1:1) to afford **R-Mosher ester** (6.00 mg, 65.0 % yield). <sup>1</sup>H NMR (400 MHz, CDCl<sub>3</sub>) δ 7.59 (dd, *J* = 6.8, 3.0 Hz, 2H), 7.46 – 7.37 (m, 3H), 6.10 (d, *J* = 2.9 Hz, 1H), 5.10 (s, 1H), 4.67 (d, *J* = 2.8 Hz, 1H), 3.86 (s, 3H), 3.57 (d, *J* = 1.1 Hz, 3H), 2.49 (dtd, *J* = 13.8, 6.9, 2.7 Hz, 1H), 2.41 (qt, *J* = 6.9, 3.4 Hz, 1H), 1.13 (dd, *J* = 9.4, 7.0 Hz, 6H), 0.93 (d, *J* = 6.9 Hz, 3H), 0.74 (d, *J* = 6.9 Hz, 3H).

### 3.16 General procedure for the synthesis of **20**

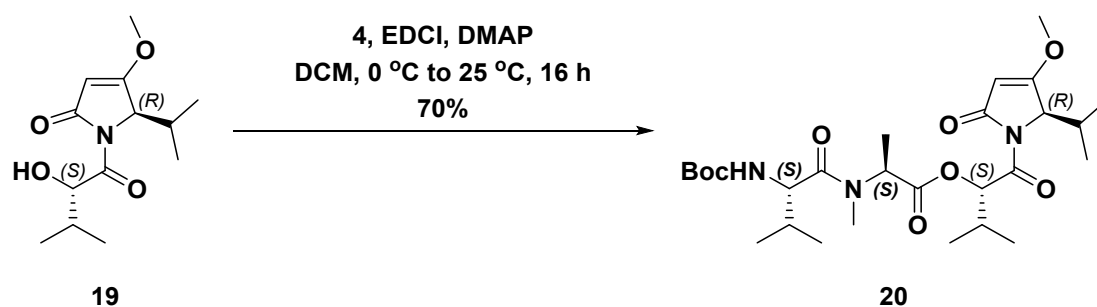

To a solution of compound **19** (35.00 mg, 0.14 mmol, 1.0 eq) and compound **4** (53.89 mg, 0.18 mmol, 1.3 eq) in DCM (2 ml) was added EDCI (39.42 mg, 0.21 mmol, 1.5 eq) at 0°C under N<sub>2</sub>. The resulting solution was stirred at 0°C under N<sub>2</sub> for 30 mins. Then a solution of DMAP (3.35 mg, 0.027 mmol, 0.2 eq) in DCM (1 ml) was added dropwise above solution at 0°C under N<sub>2</sub>. The resulting solution was stirred at 25°C under N<sub>2</sub> for 16 hours. Water (3 ml) was added to above solution at 0°C, extracted with EtOAc (5 ml) three times. The organic layers was combined, washed with brine (3 ml), dried over Na<sub>2</sub>SO<sub>4</sub>, filtrated and concentrated to afford a crude product, purified by silica gel column (PE : EtOAc = 1:1) to afford compound **20** (52.00 mg, 70.3 % yield). [α]<sub>D</sub><sup>25</sup> = −30.6 (c = 0.1, MeOH). <sup>1</sup>H NMR (400 MHz, CDCl<sub>3</sub>) δ 5.86 (q, *J*





NMR (101 MHz, CDCl<sub>3</sub>)  $\delta$  178.8, 171.7, 171.2, 170.2, 168.6, 167.7, 93.3, 77.5, 67.8, 62.6, 57.6, 52.7, 51.5, 41.8, 35.9, 30.8, 30.7, 29.0, 28.7, 28.5, 28.2, 27.6, 24.4, 21.6, 18.7, 18.6, 17.7, 16.2, 14.9, 14.2, 13.3, 13.1. HRMS(ES<sup>+</sup>): m/z Found: 632.3887 [M+Na]<sup>+</sup>, Calcd.: 632.3881.

#### **4.Cytotoxicity Assays for Kavaratamide A and 5-epi-Kavaratamide A**

A viability assay was carried out to evaluate the cytotoxic activity of kavaratamide A and 5-epi-kavaratamide A in U251, 4T1, HepG2 and PANC1 cells. Cells were seeded at  $2 \times 10^4$  cells/mL into white 96-well plates for overnight and then exposed to kavaratamide A and 5-epi-kavaratamide A at concentration of 0.01-100  $\mu$ M. After 72 hours incubation, 10  $\mu$ l of CCK-8 reagent was added to each well and incubated for 2.5 h at 37 °C. The absorbance at 450 nm was measured using a microplate reader.

#### **5. Comparison of the Spectra of Isolated and Synthetic Compounds**

**NMR** comparison of natural **Kavaratamide A** [500 MHz ( $^1\text{H}$ ) and 125 MHz ( $^{13}\text{C}$ ) in  $\text{CDCl}_3$ ] and synthetic **Kavaratamide A** [400 MHz ( $^1\text{H}$ ) and 100 MHz ( $^{13}\text{C}$ ) in  $\text{CDCl}_3$ ].

| Position     |    | Natural<br><b>Kavaratamide A</b> |                       | Synthetic<br><b>Kavaratamide A</b> |                     | Difference<br>value |                     |
|--------------|----|----------------------------------|-----------------------|------------------------------------|---------------------|---------------------|---------------------|
|              |    | $\delta_{\text{H}}$ (J in Hz)    | $\delta_{\text{C}}$   | $\delta_{\text{H}}$ (J in Hz)      | $\delta_{\text{C}}$ | $\delta_{\text{H}}$ | $\delta_{\text{C}}$ |
| iPr-O-Me-Pyr | 1  | 3.85, s                          | 58.7, CH <sub>3</sub> | 3.85, s                            | 58.7                | 0.0                 | 0.0                 |
|              | 2  |                                  | 170.2, C              |                                    | 170.1               |                     | -0.1                |
|              | 3  | 5.07, s                          | 94.7, CH              | 5.07, s                            | 94.7                | 0.0                 | 0.0                 |
|              | 4  |                                  | 180.0, C              |                                    | 180.0               |                     | 0.0                 |
|              | 5  | 4.50, d (2.5)                    | 64.4, CH              | 4.50, d (2.7)                      | 64.4                | 0.0                 | 0.0                 |
|              | 6  | 2.56, sepd (7.5, 2.5)            | 28.5, CH              | 2.59, sepd (7.1, 4.5)              | 28.5                | 0.03                | 0.0                 |
|              | 7  | 1.09, d (7.5)                    | 18.8, CH <sub>3</sub> | 1.09, d (7.2)                      | 18.8                | 0.0                 | 0.0                 |
|              | 8  | 0.78, d (7.0)                    | 15.3, CH <sub>3</sub> | 0.78, d (6.9)                      | 15.3                | 0.0                 | 0.0                 |
| Hiva         | 9  |                                  | 169.1, C              |                                    | 169.1               |                     | 0.0                 |
|              | 10 | 5.82, d (3.5)                    | 78.4, CH              | 5.82, d (3.2)                      | 78.4                | 0.0                 | 0.0                 |
|              | 11 | 2.23, sepd (6.5, 3.0)            | 28.9, CH              | 2.23, m                            | 28.9                | 0.0                 | 0.0                 |
|              | 12 | 1.05, d (6.5)                    | 19.8, CH <sub>3</sub> | 1.04, d (6.7)                      | 19.8                | -0.01               | 0.0                 |
|              | 13 | 0.92, d (7.0)                    | 16.1, CH <sub>3</sub> | 0.92, d (6.5)                      | 16.1                | 0.0                 | 0.0                 |
| N-Me-Ala     | 14 |                                  | 171.1, C              |                                    | 171.1               |                     | 0.0                 |
|              | 15 | 5.29, q (7.0)                    | 52.8, CH              | 5.28, q (7.2)                      | 52.8                | -0.01               | 0.0                 |
|              | 16 | 1.46, d (7.0)                    | 14.2, CH <sub>3</sub> | 1.45, d (7.3)                      | 14.2                | -0.01               | 0.0                 |
|              | 17 | 3.04, s                          | 31.9, CH <sub>3</sub> | 3.04, s                            | 31.9                | 0.0                 | 0.0                 |
| Val          | 18 |                                  | 172.3, C              |                                    | 172.2               |                     | -0.1                |
|              | 19 | 4.84, dd (8.5, 5.5)              | 53.9, CH              | 4.83, dd (8.9, 5.5)                | 53.9                | -0.01               | 0.0                 |
|              | 20 | 2.06, sep (7.0)                  | 31.3, CH              | 2.06, dt (12.5, 6.5)               | 31.3                | -0.01               | 0.0                 |
|              | 21 | 1.01, d (7.0)                    | 19.8, CH <sub>3</sub> | 1.01, d (6.8)                      | 19.8                | 0.0                 | 0.0                 |
|              | 22 | 0.91, d (6.5)                    | 17.4, CH <sub>3</sub> | 0.90, d (6.3)                      | 17.4                | -0.01               | 0.0                 |
| 19-NH        |    | 6.54, d (8.5)                    |                       | 6.48, d (8.9)                      |                     | -0.06               |                     |

|       |     |                      |                |                      |       |       |     |
|-------|-----|----------------------|----------------|----------------------|-------|-------|-----|
| 3-HDA | 23  |                      | 172.9, C       |                      | 172.9 |       | 0.0 |
|       | 24a | 2.38, dd (15.0, 2.5) | 42.9, CH2      | 2.38, dd (14.9, 2.8) | 42.9  | 0.0   | 0.0 |
|       | 24b | 2.29, dd (15.0, 9.5) |                | 2.30, d (9.1)        |       | 0.01  |     |
|       |     | 3.95, br s           |                |                      |       |       |     |
|       | 25  |                      | 69.0, CH       | 3.95, br s           | 69.0  | 0.0   | 0.0 |
|       | 26a | 1.54, dd (17.0, 7.5) | 37.1, CH2      | 1.53, dd (8.3, 7.8)  | 37.1  | -0.01 | 0.0 |
|       |     | 1.42, overlap        |                | 1.42, overlap        |       |       |     |
|       | 26b |                      |                |                      |       | 0.0   |     |
|       | 27  | 1.43–1.24, m         | 25.6, CH2      | 1.43–1.24, m         | 25.6  | 0.0   | 0.0 |
|       | 28  | 1.43–1.24, m         | 29.7c ,<br>CH2 | 1.43–1.24, m         | 29.7  | 0.0   | 0.0 |
|       | 29  | 1.43–1.24, m         | 29.4c ,<br>CH2 | 1.43–1.24, m         | 29.4  | 0.0   | 0.0 |
|       | 30  | 1.43–1.24, m         | 31.9, CH2      | 1.43–1.24, m         | 31.9  | 0.0   | 0.0 |
|       | 31  | 1.43–1.24, m         | 22.8, CH2      | 1.43–1.24, m         | 22.8  | 0.0   | 0.0 |
|       | 32  | 0.88, t (7.0)        | 14.3, CH3      | 0.87, t (6.7)        | 14.3  | -0.01 | 0.0 |

## 6.The copies of $^1\text{H}$ , $^{13}\text{C}$ NMR

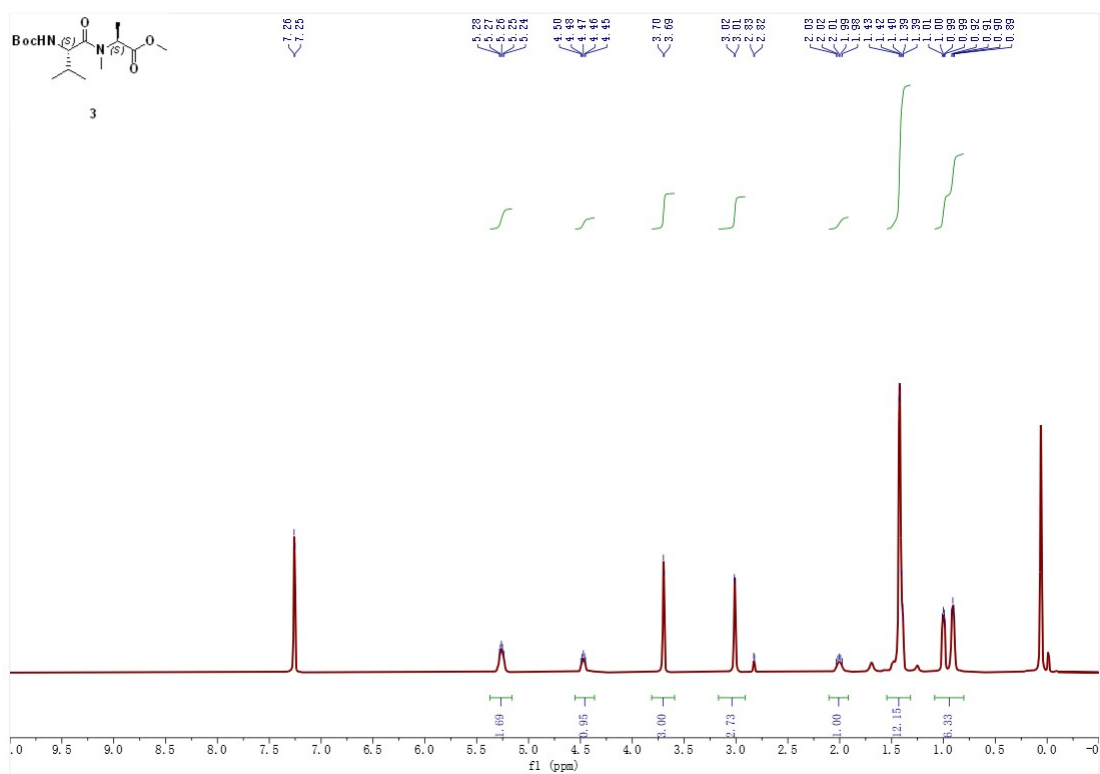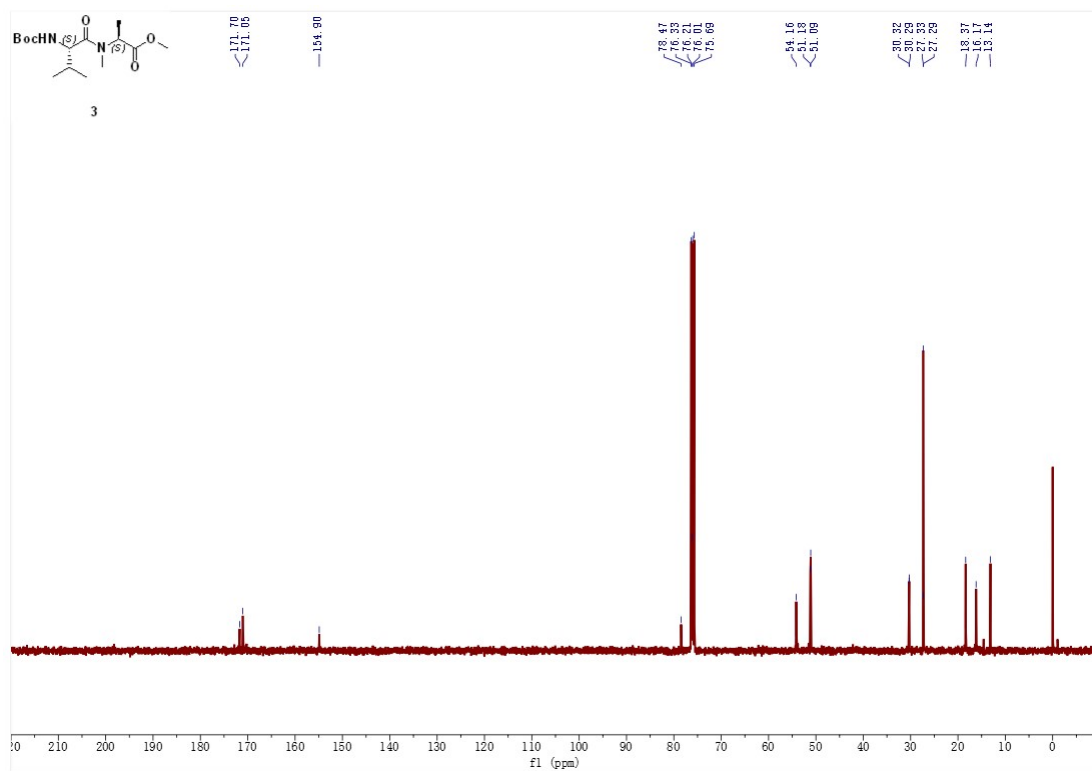

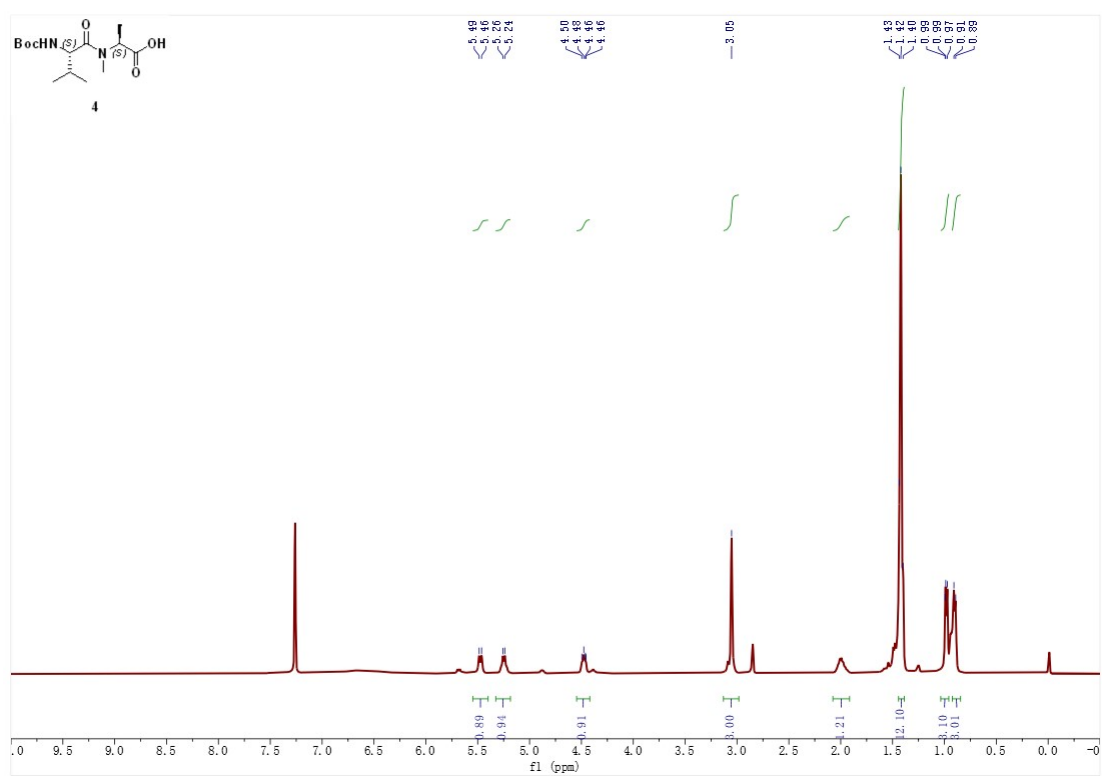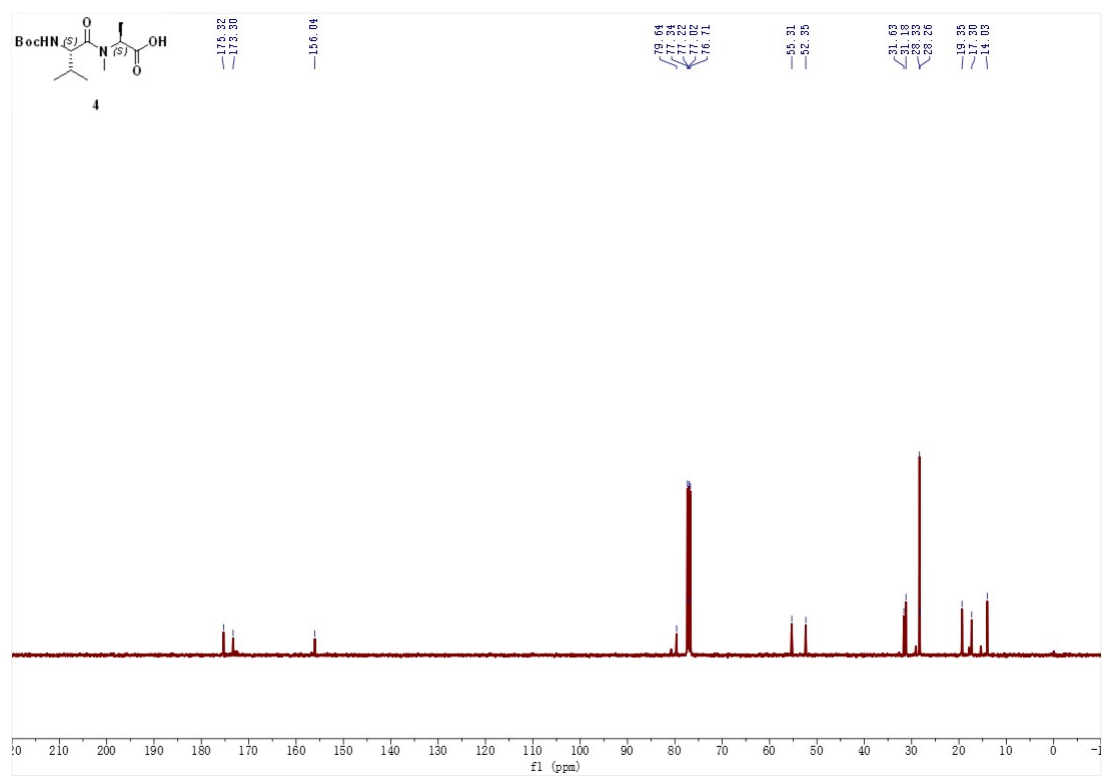

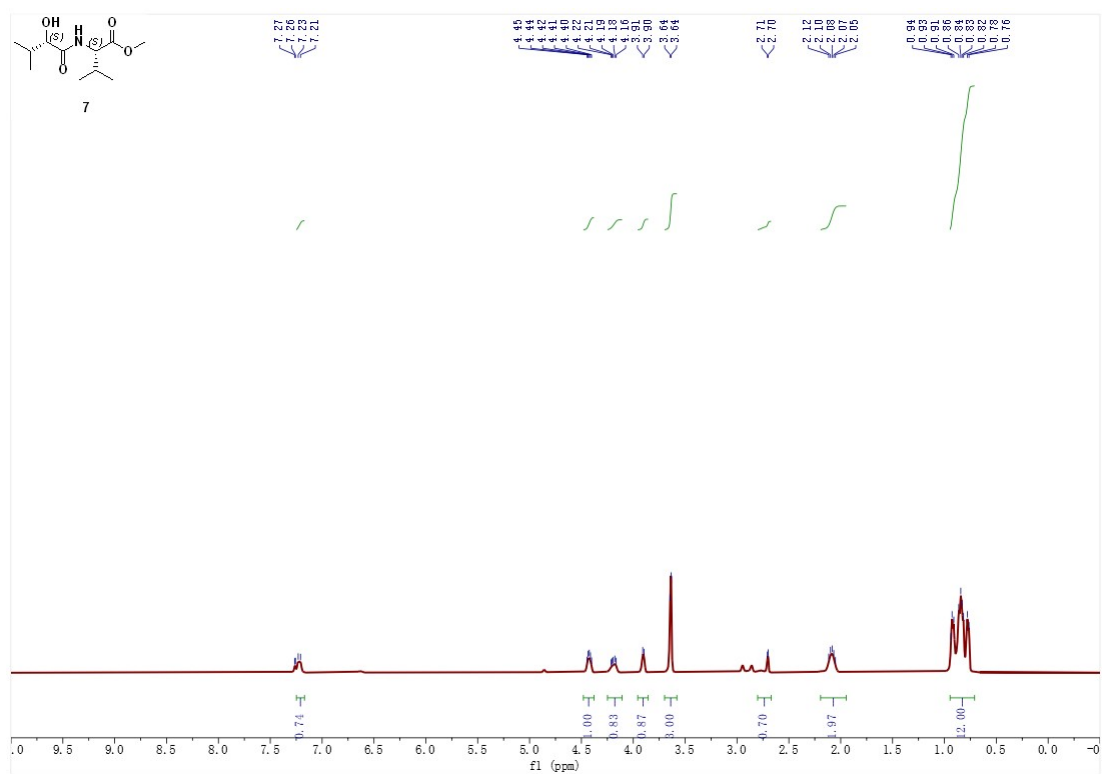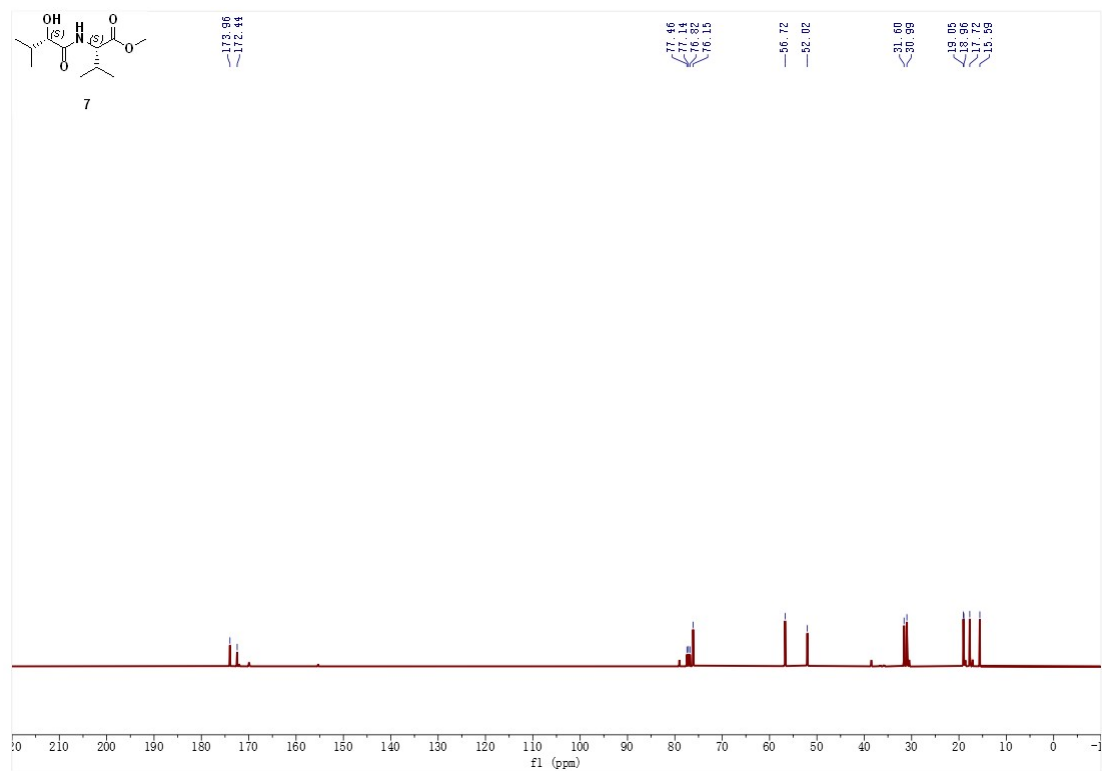

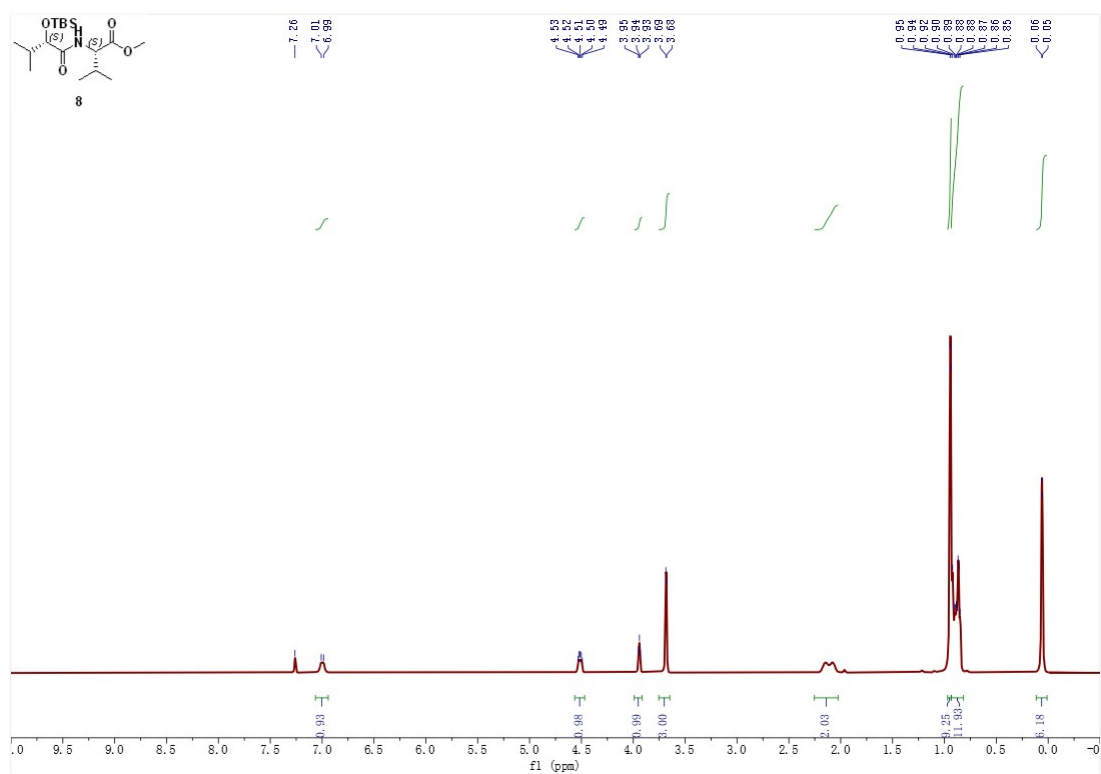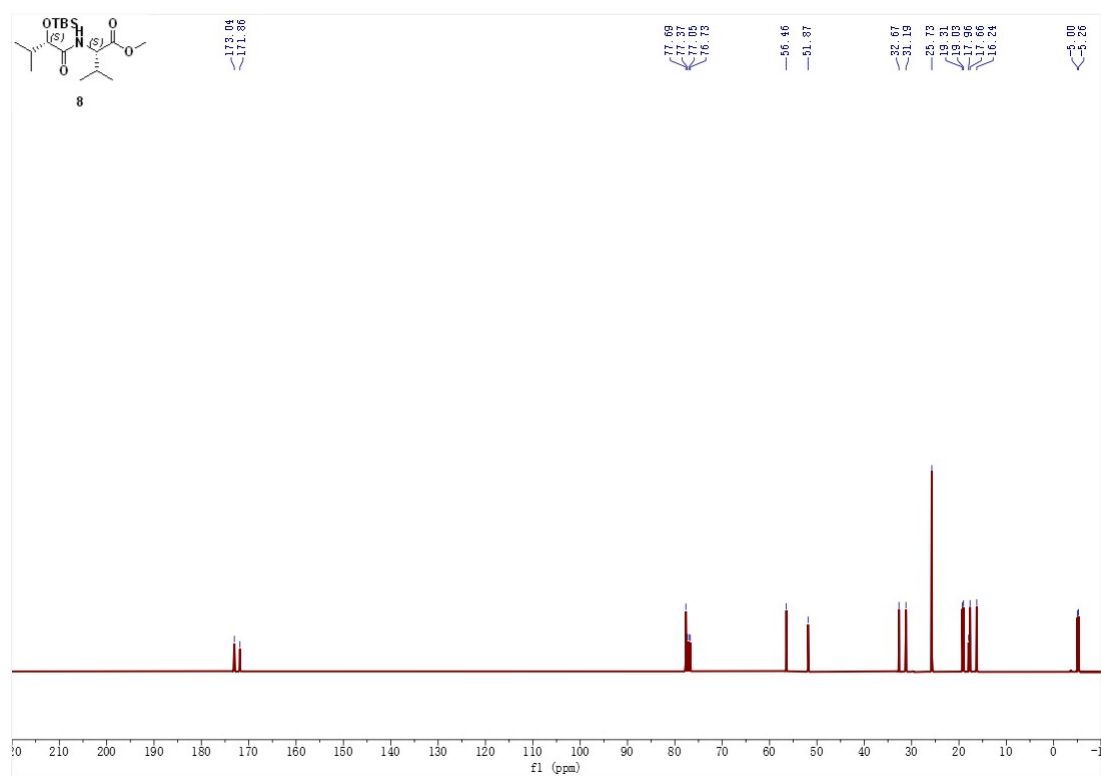

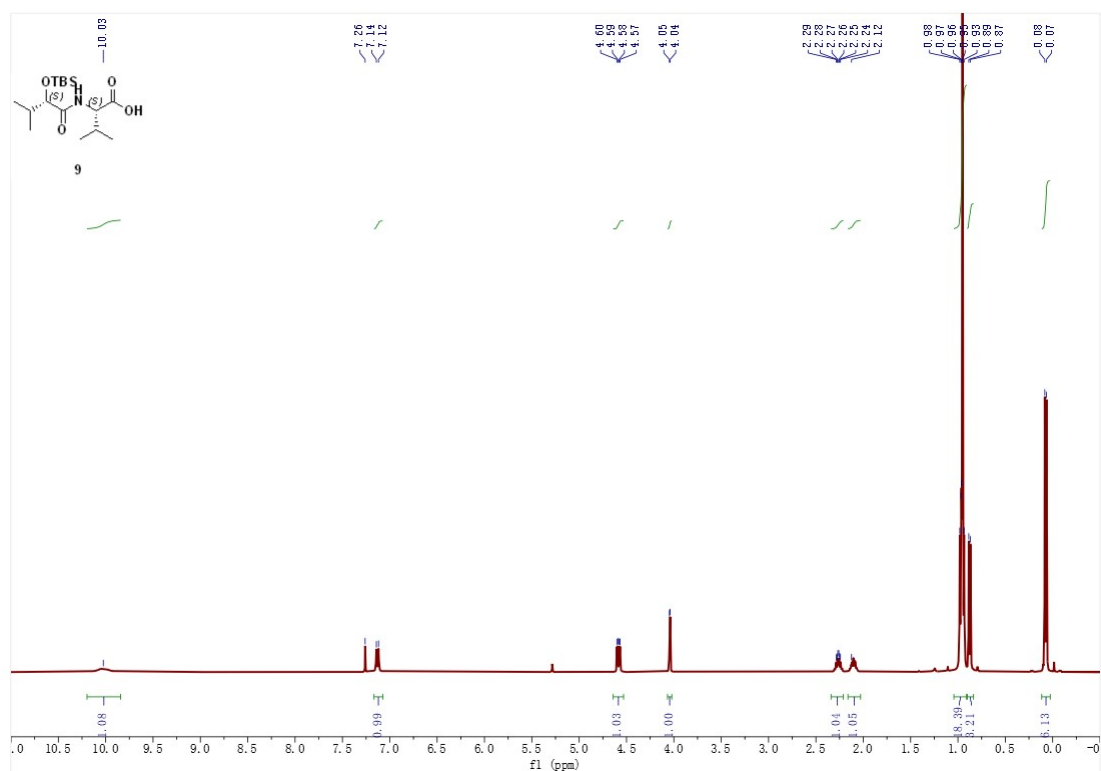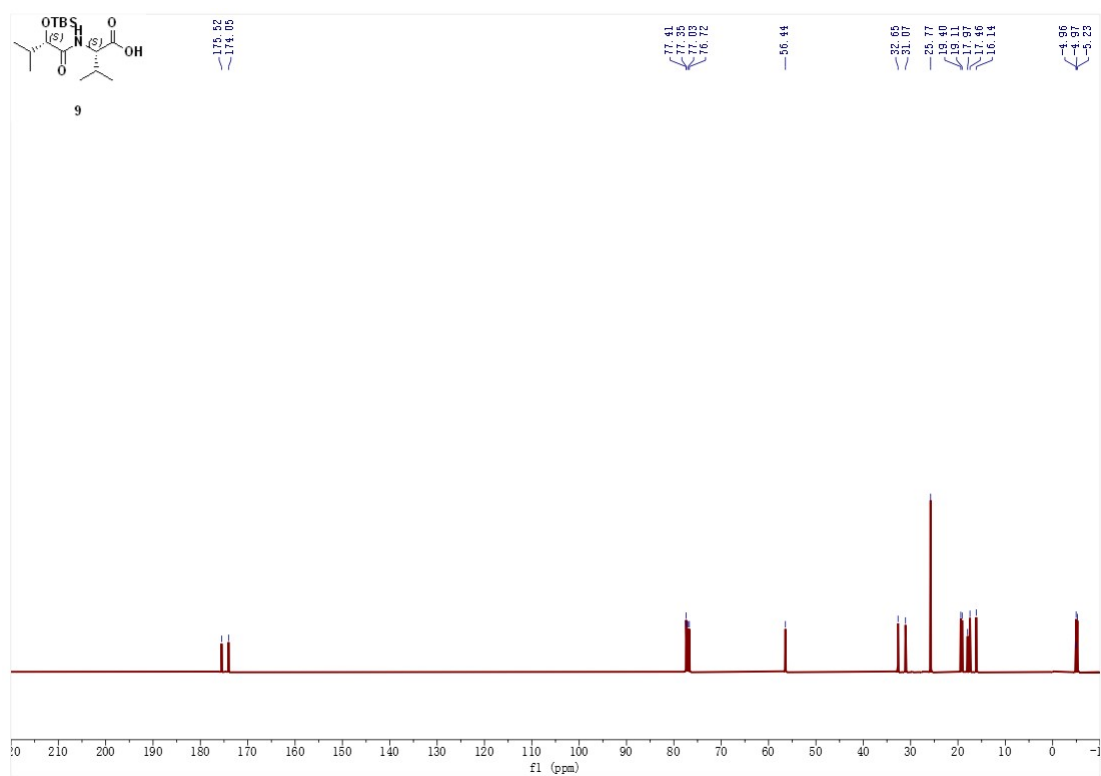



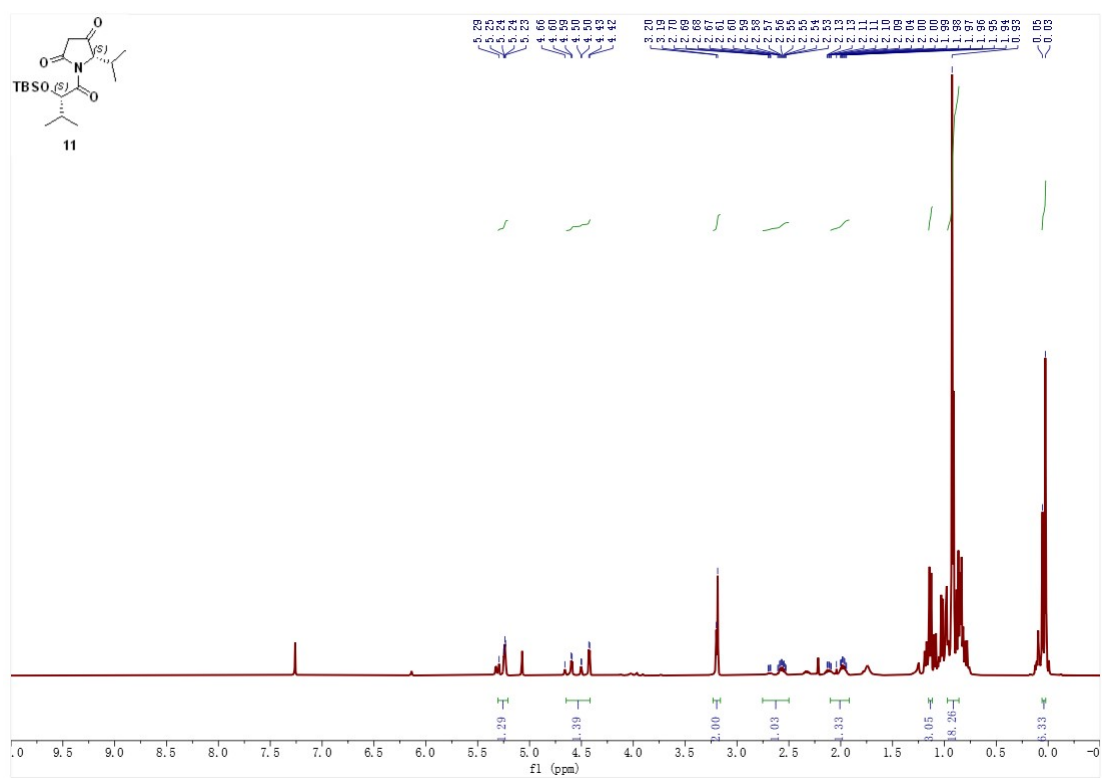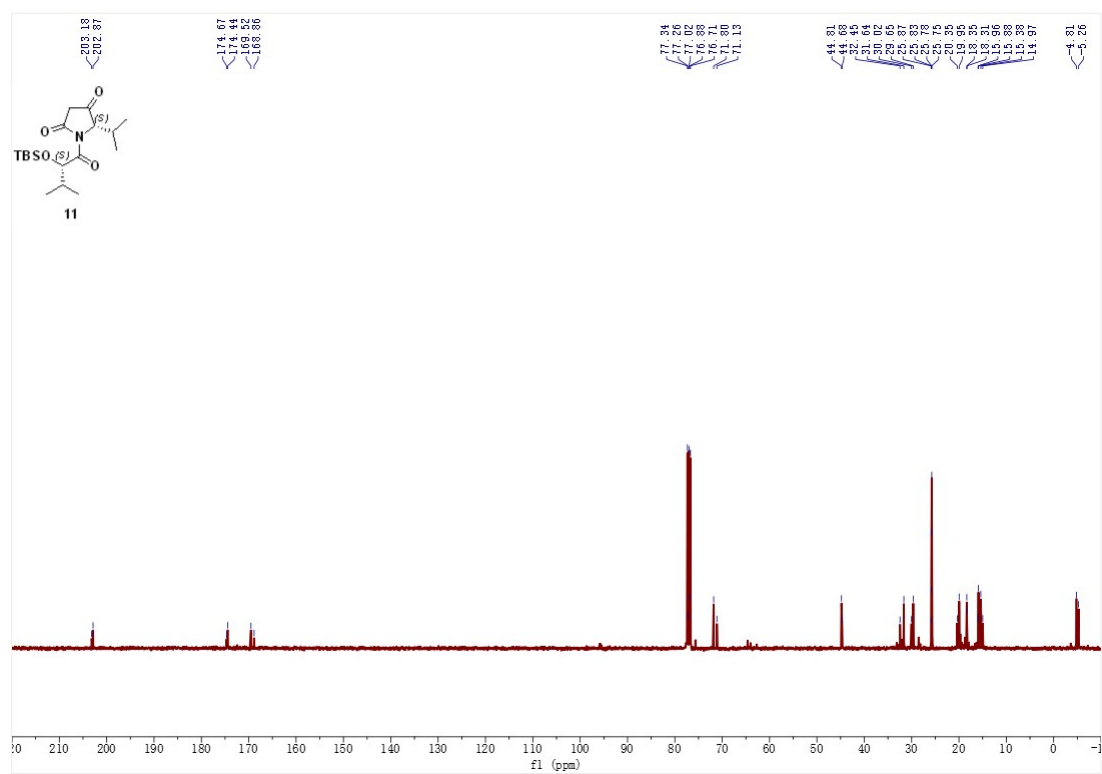

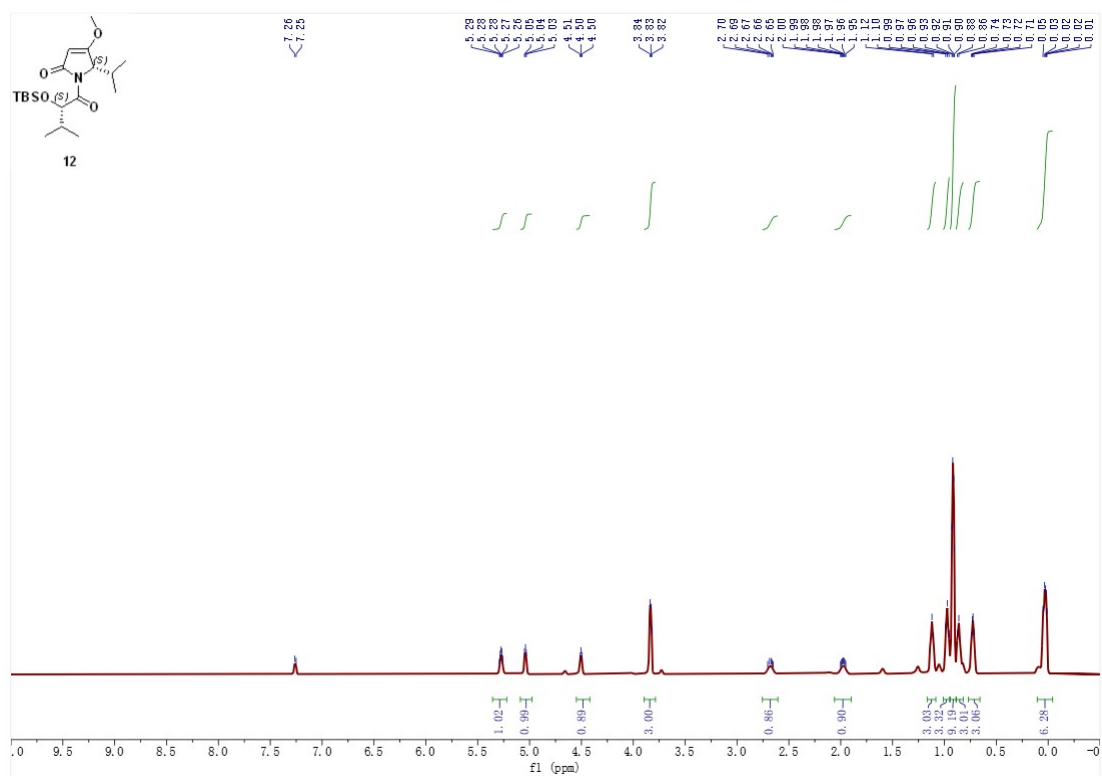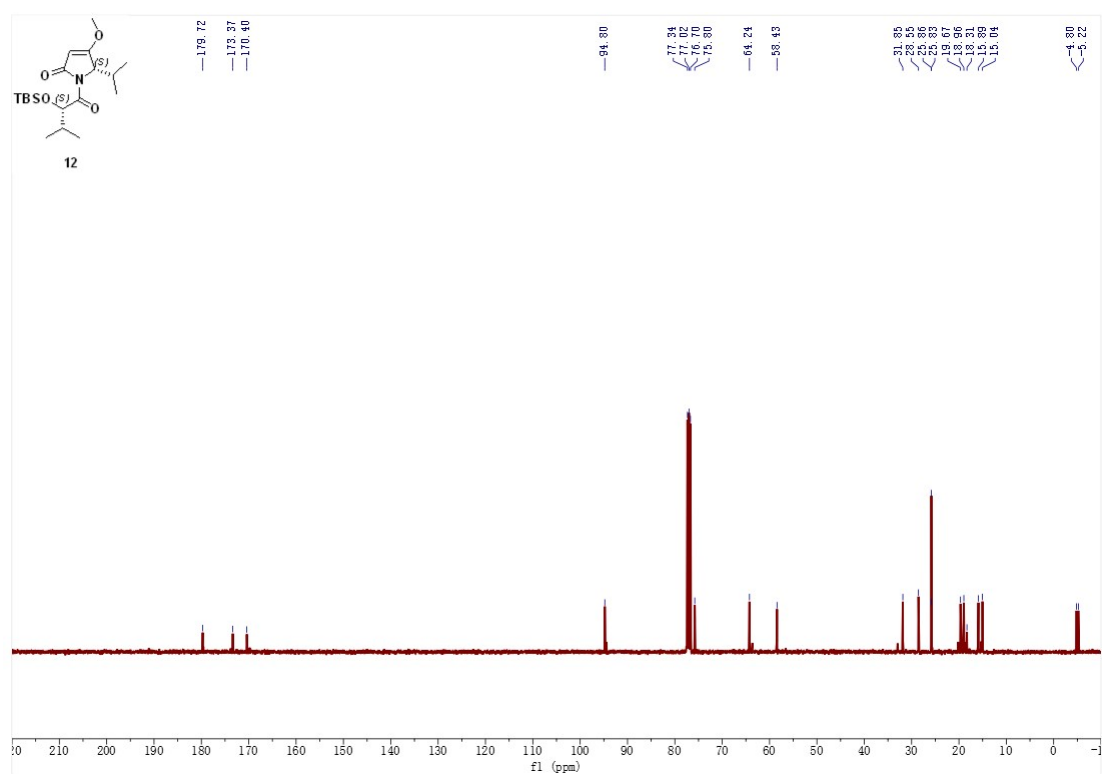

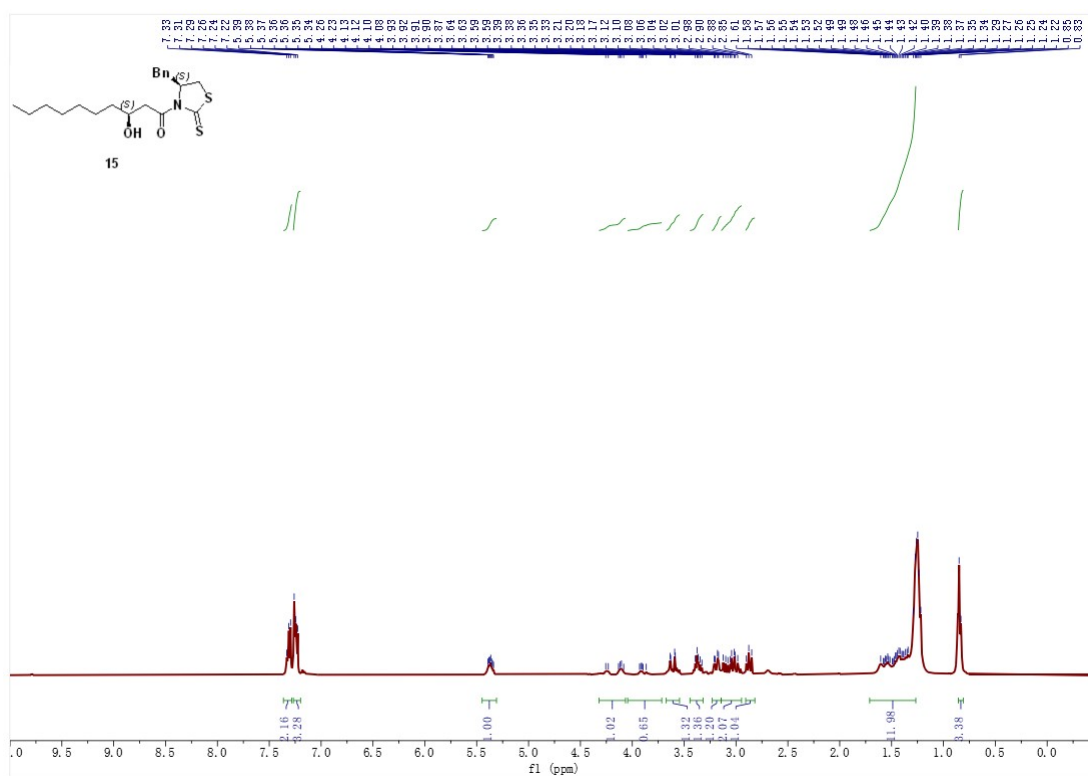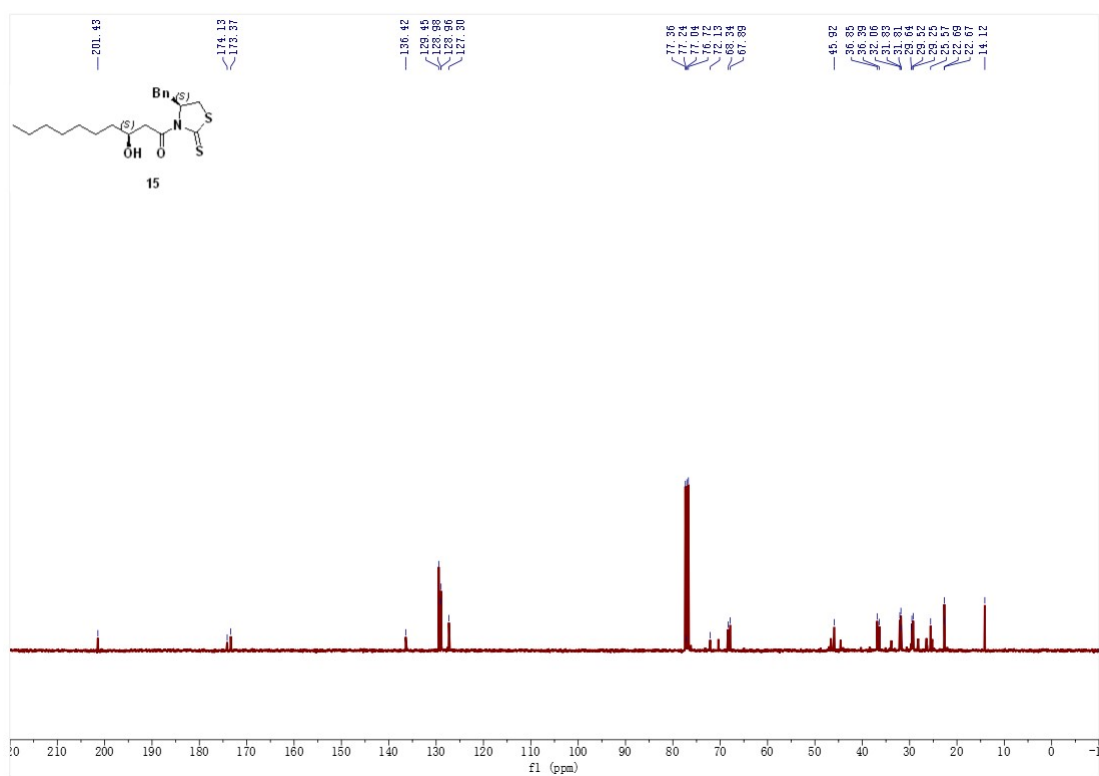

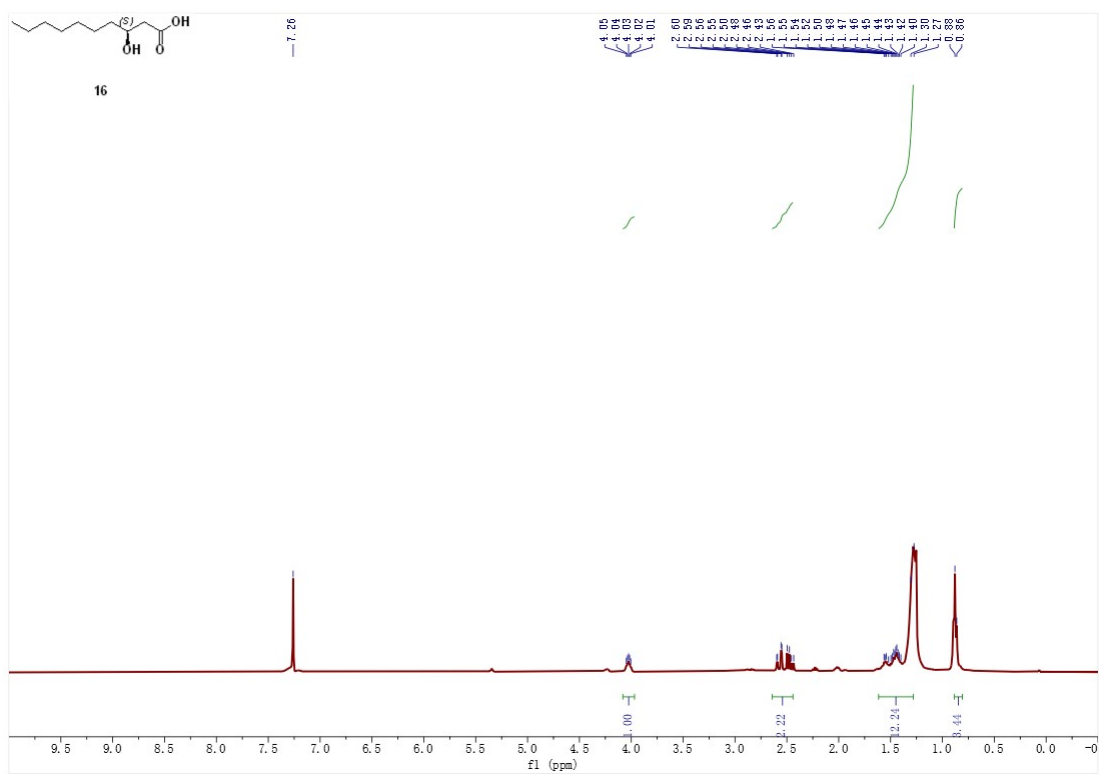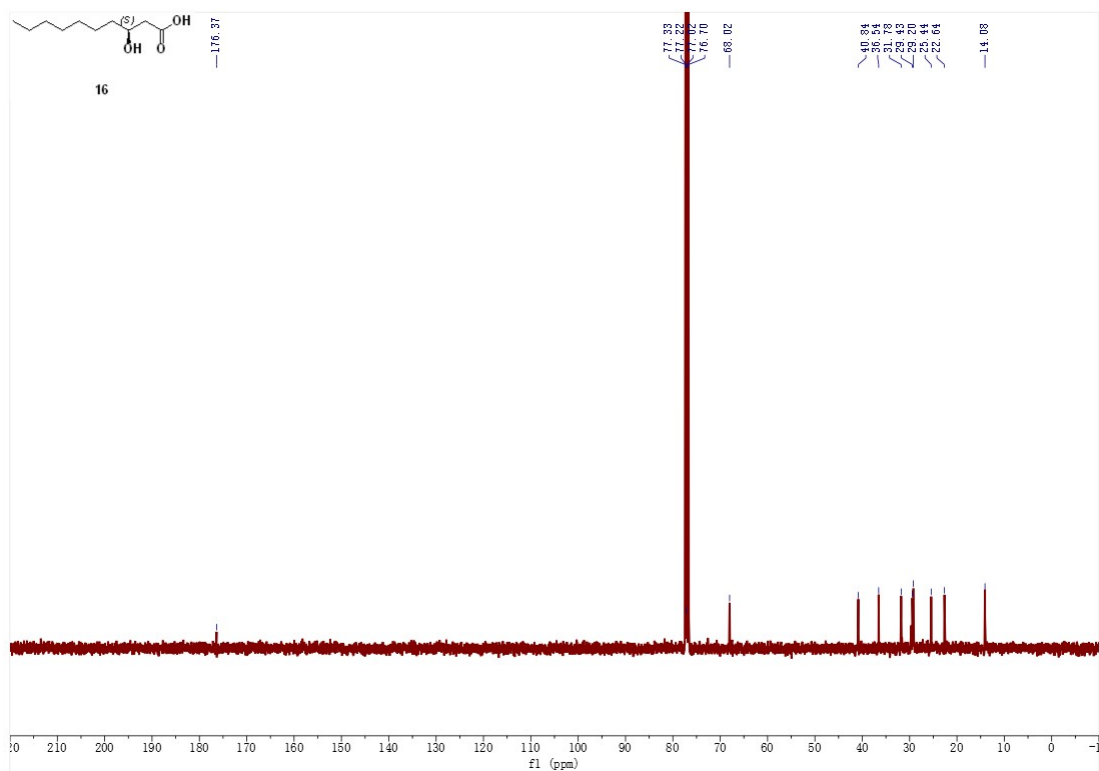





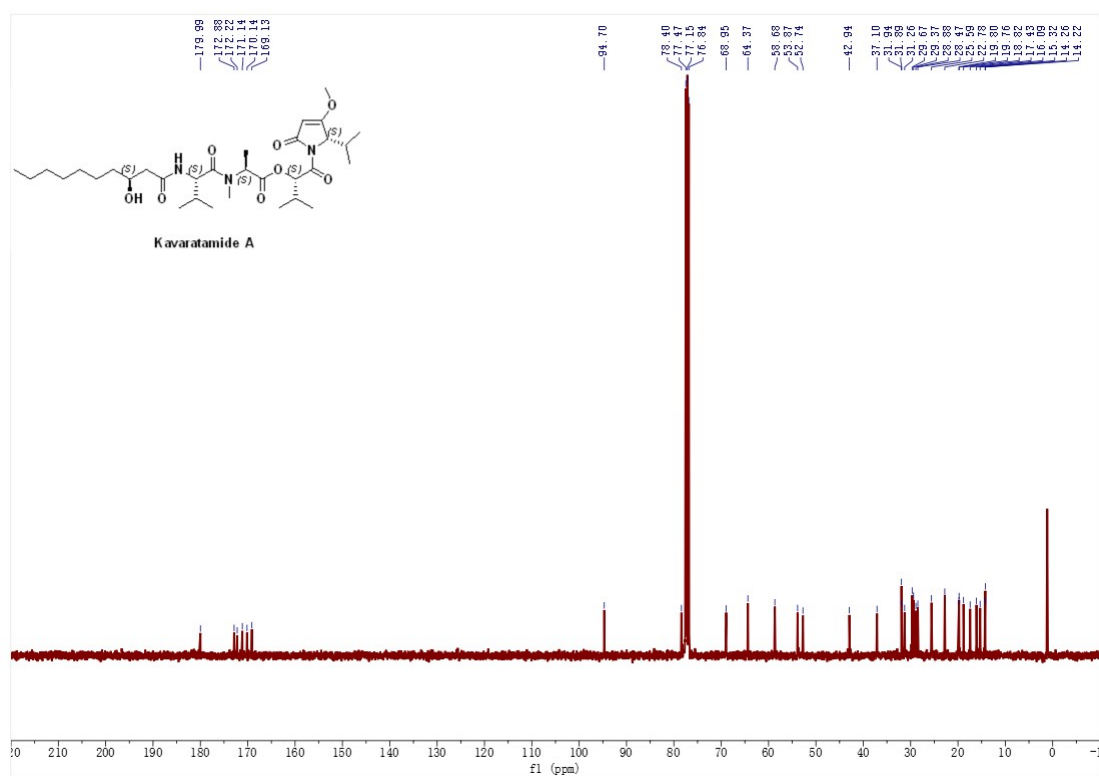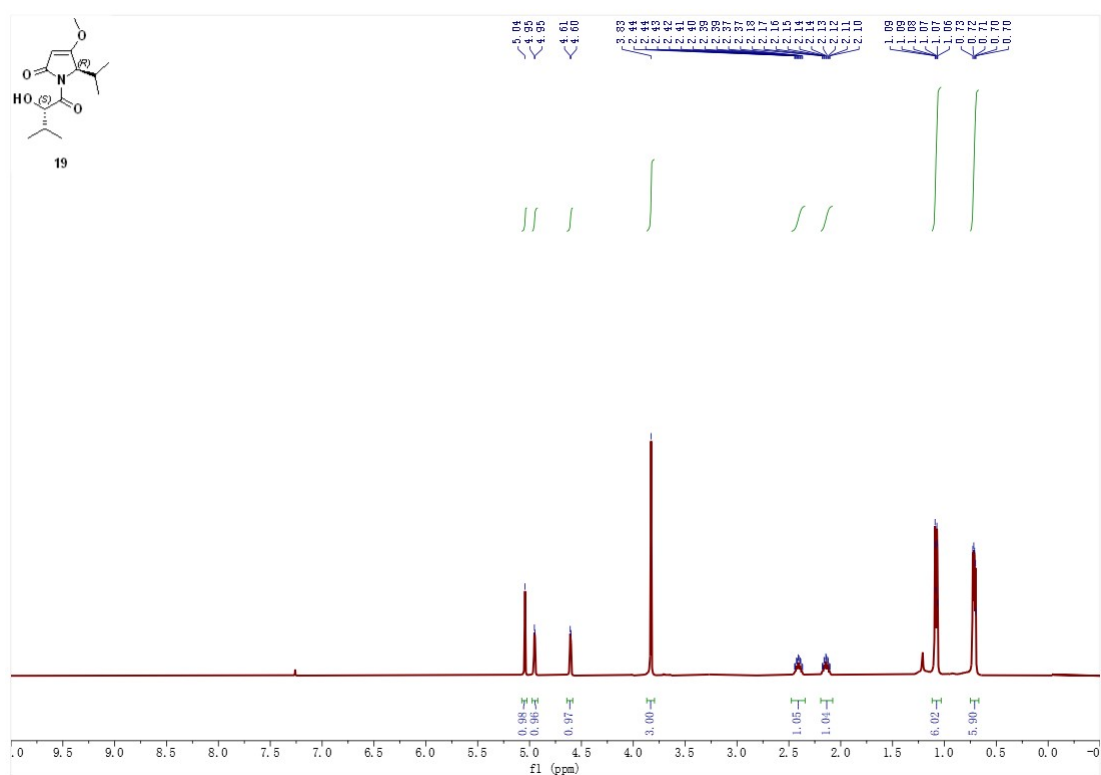

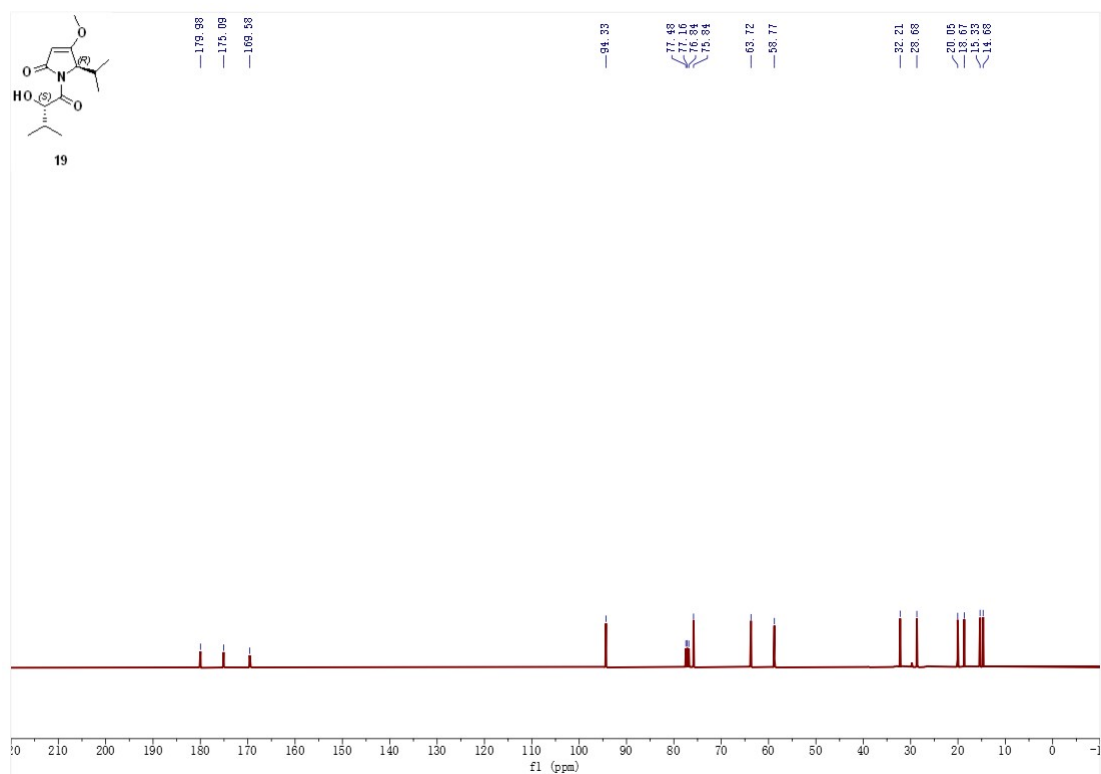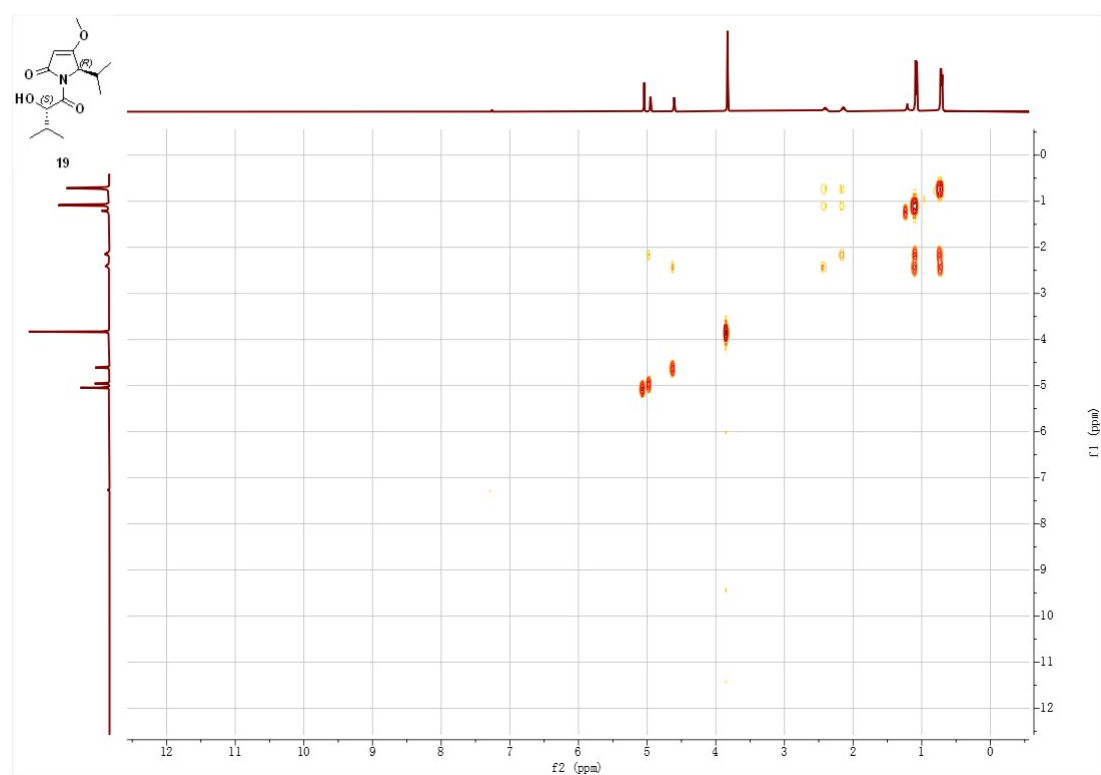



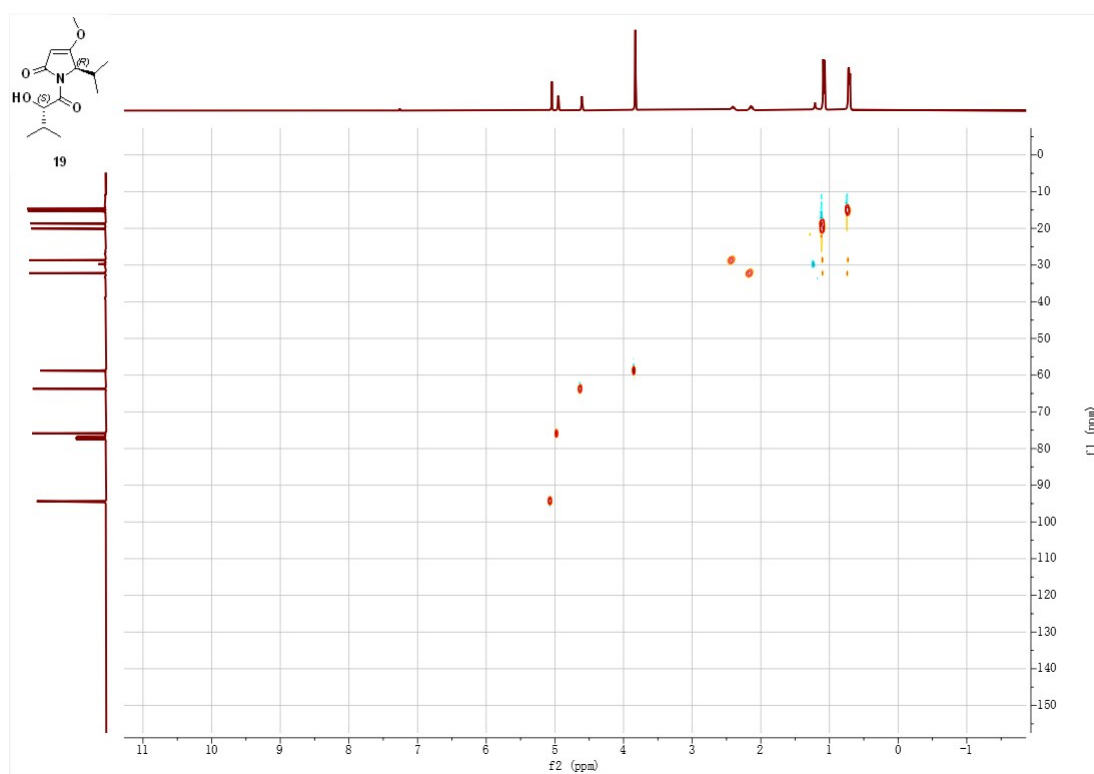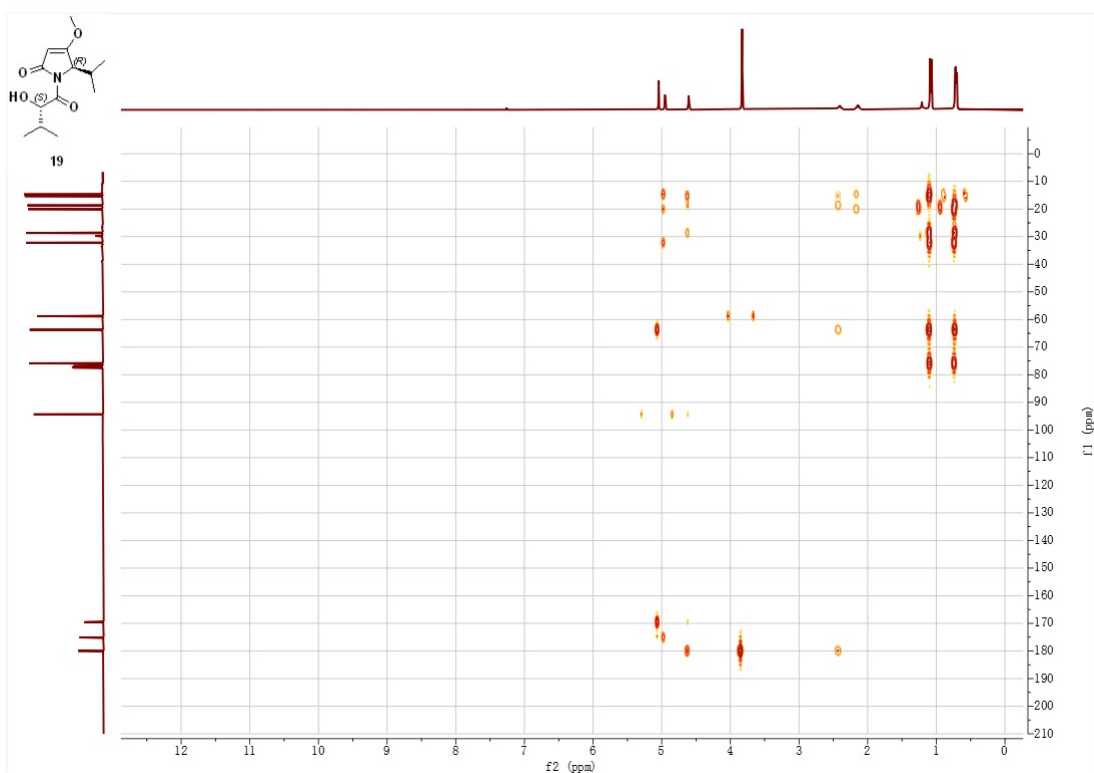

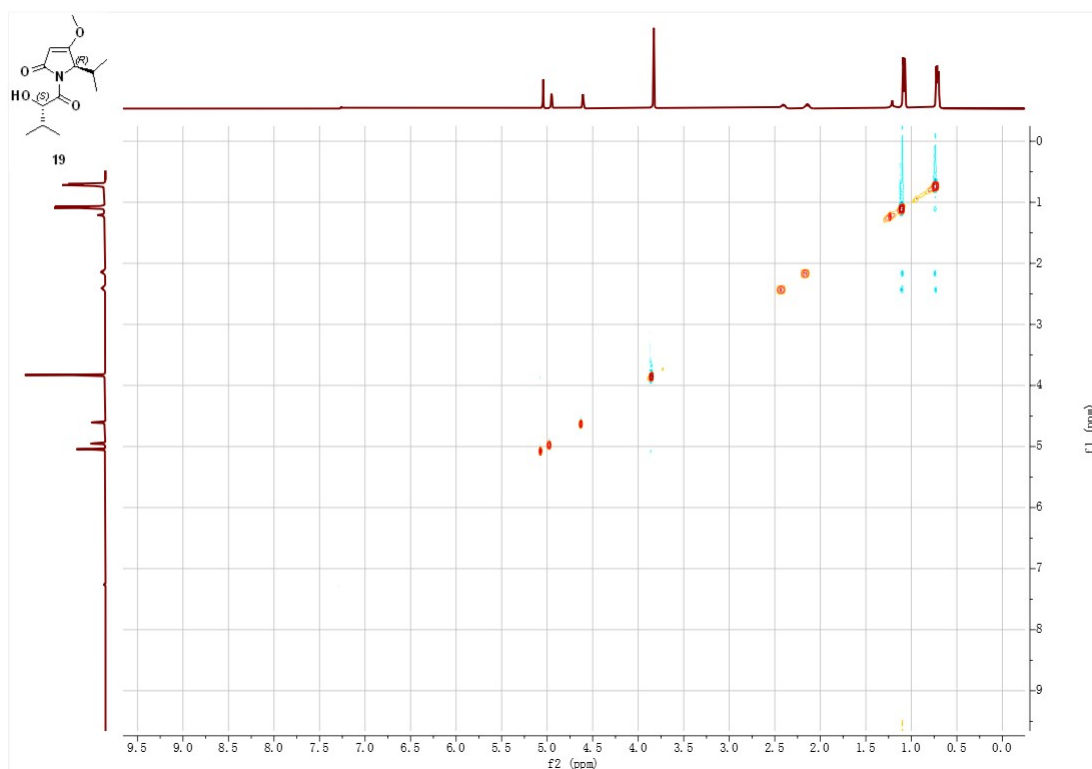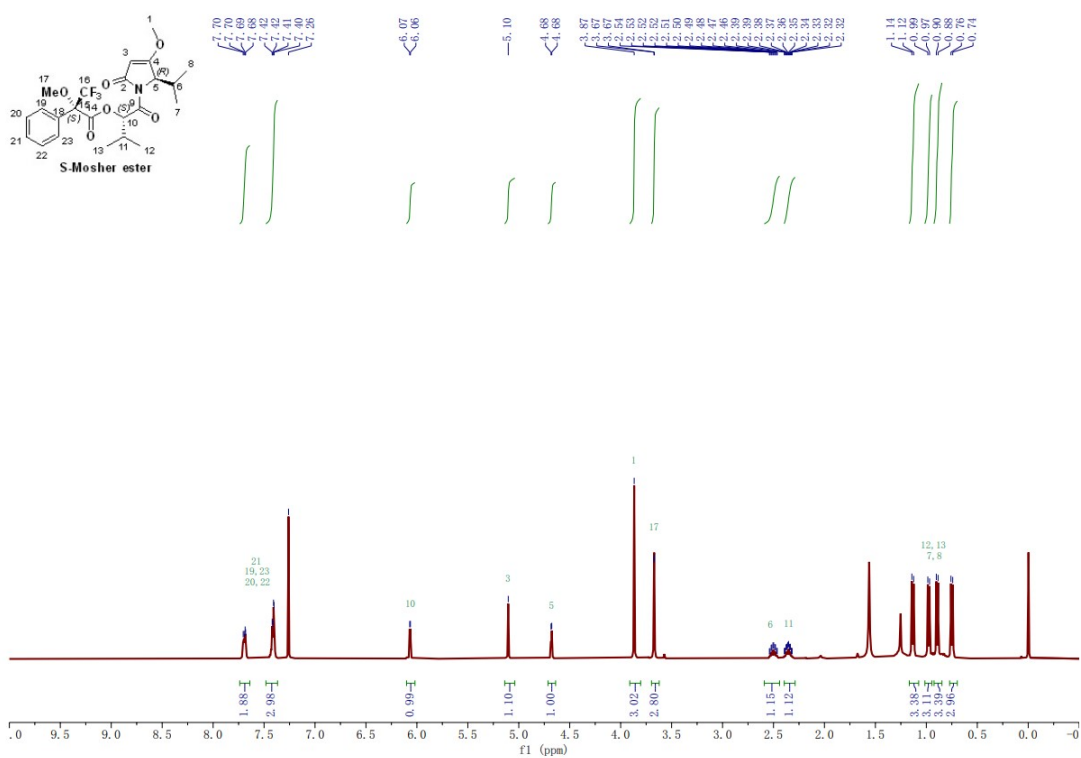

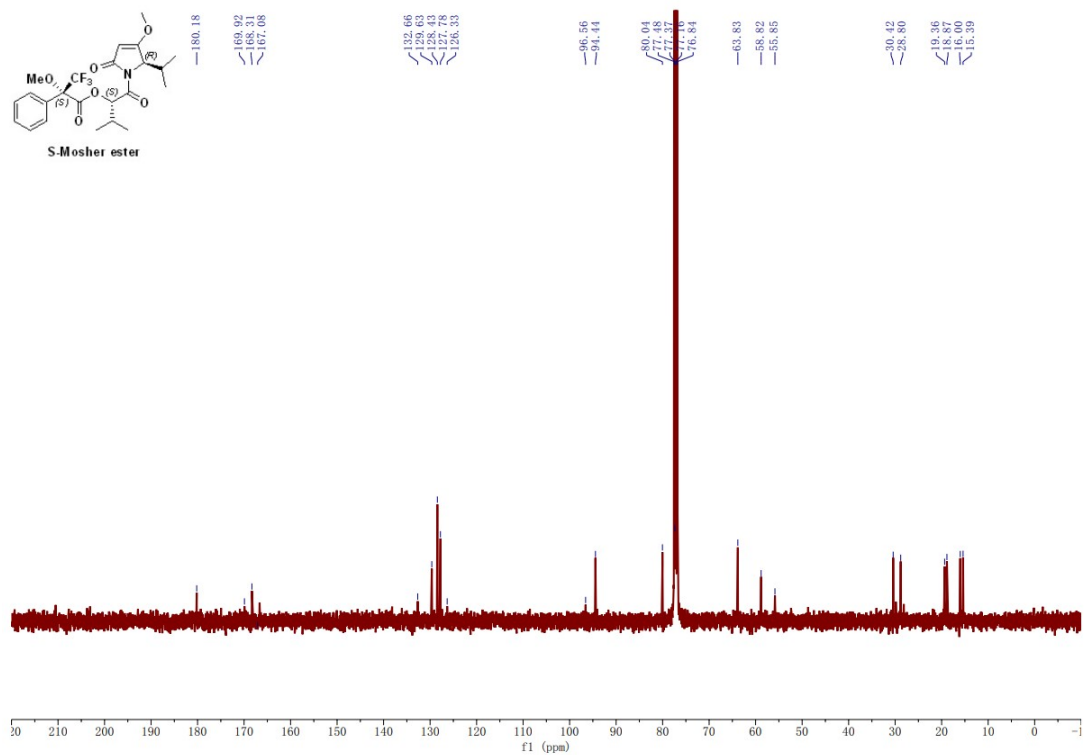

$^1\text{H}$ - $^1\text{H}$  COSY of *S*-Mosher ester

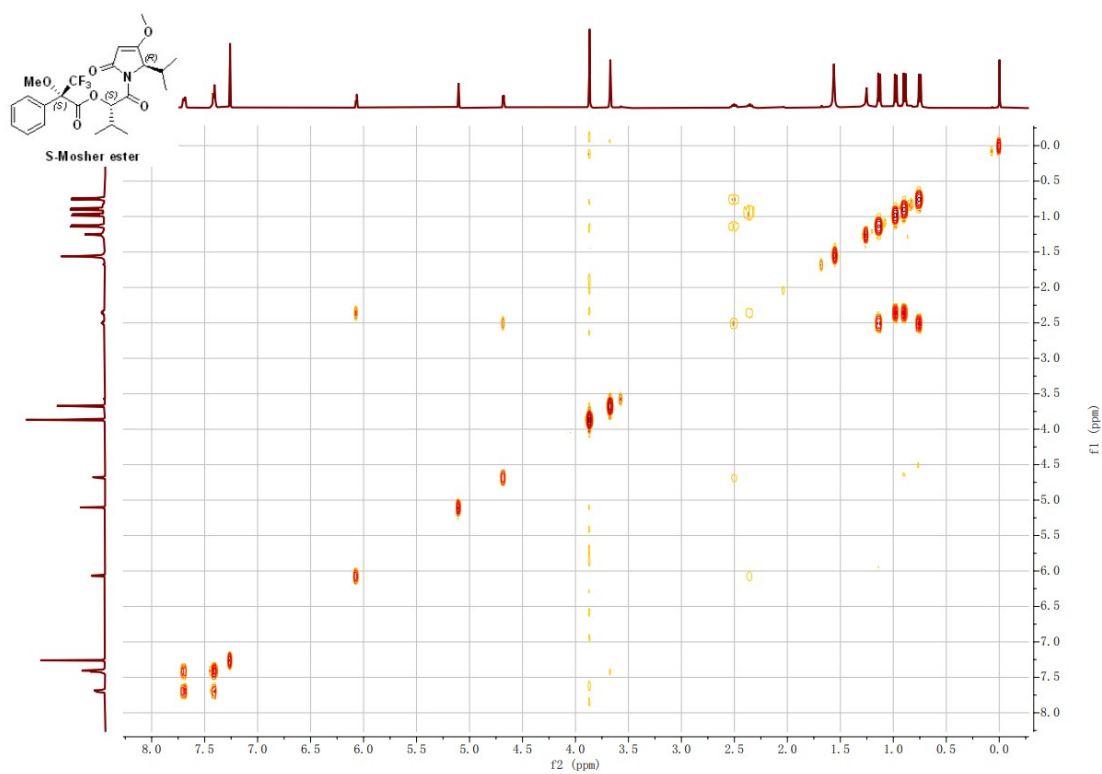

# HSQC of *S*-Mosher ester

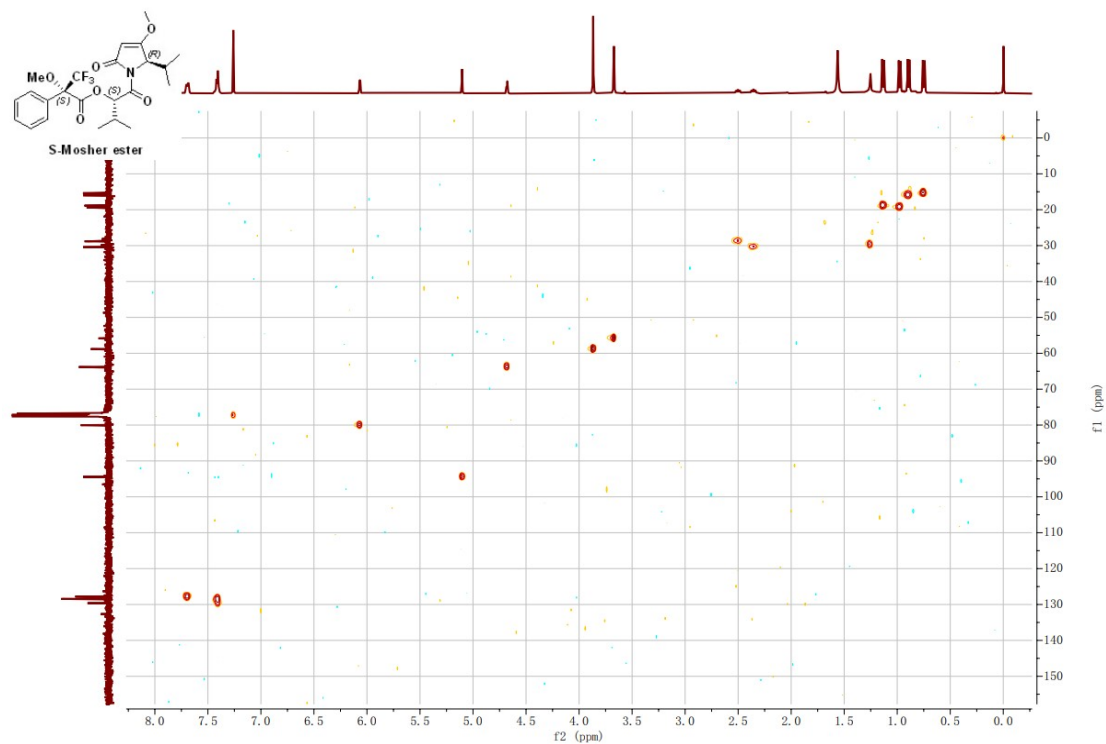

# HMBC of *S*-Mosher ester

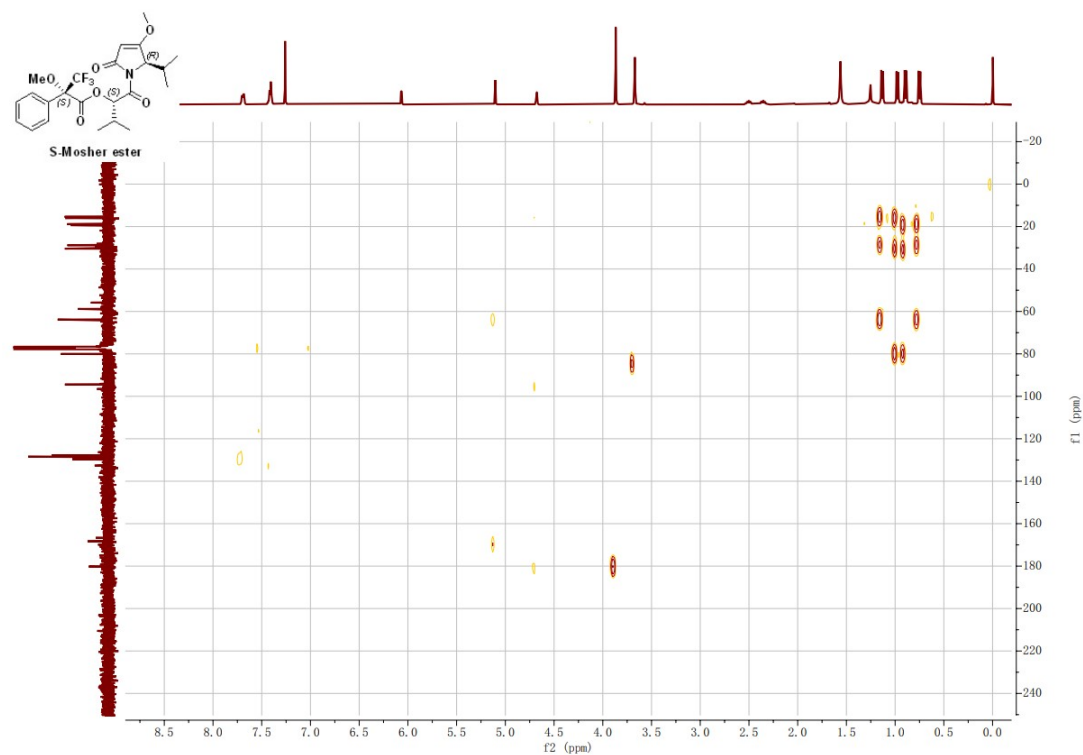

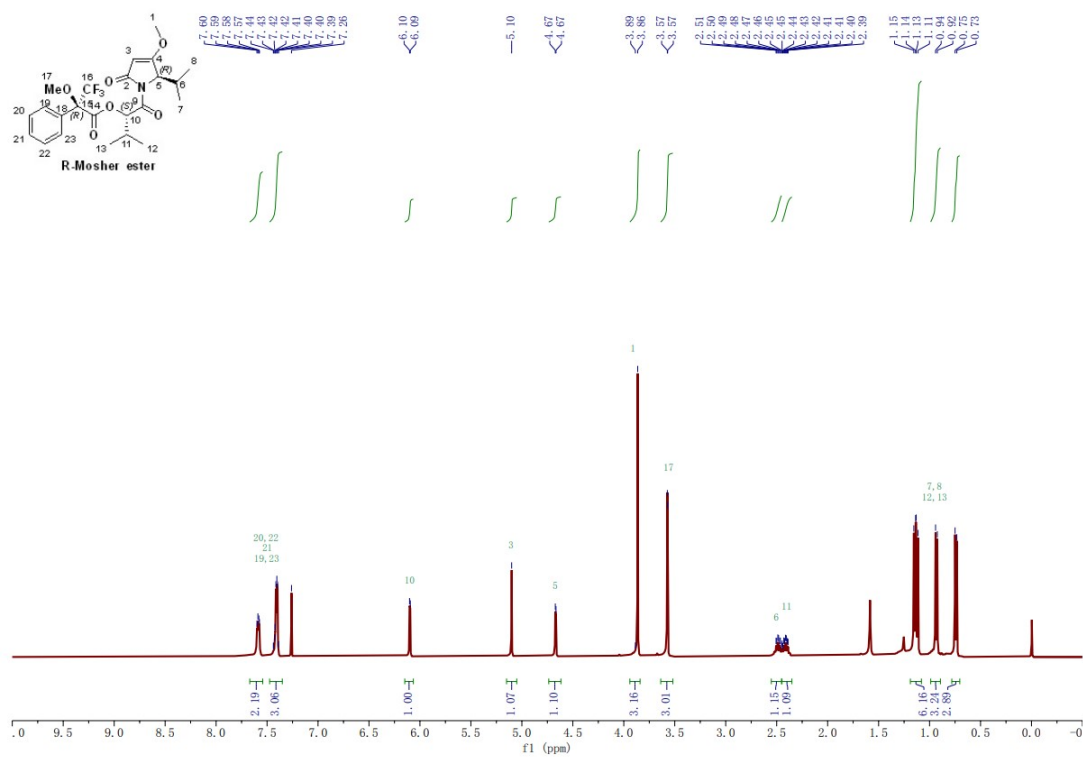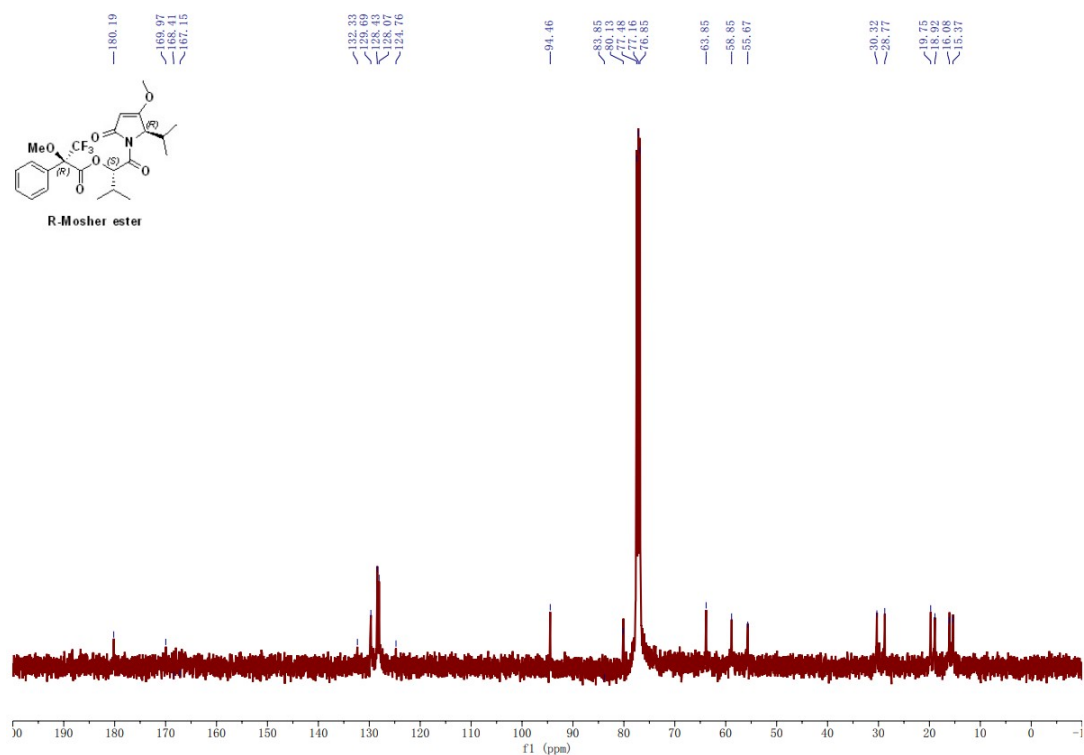

# <sup>1</sup>H-<sup>1</sup>H COSY of *R*-Mosher ester

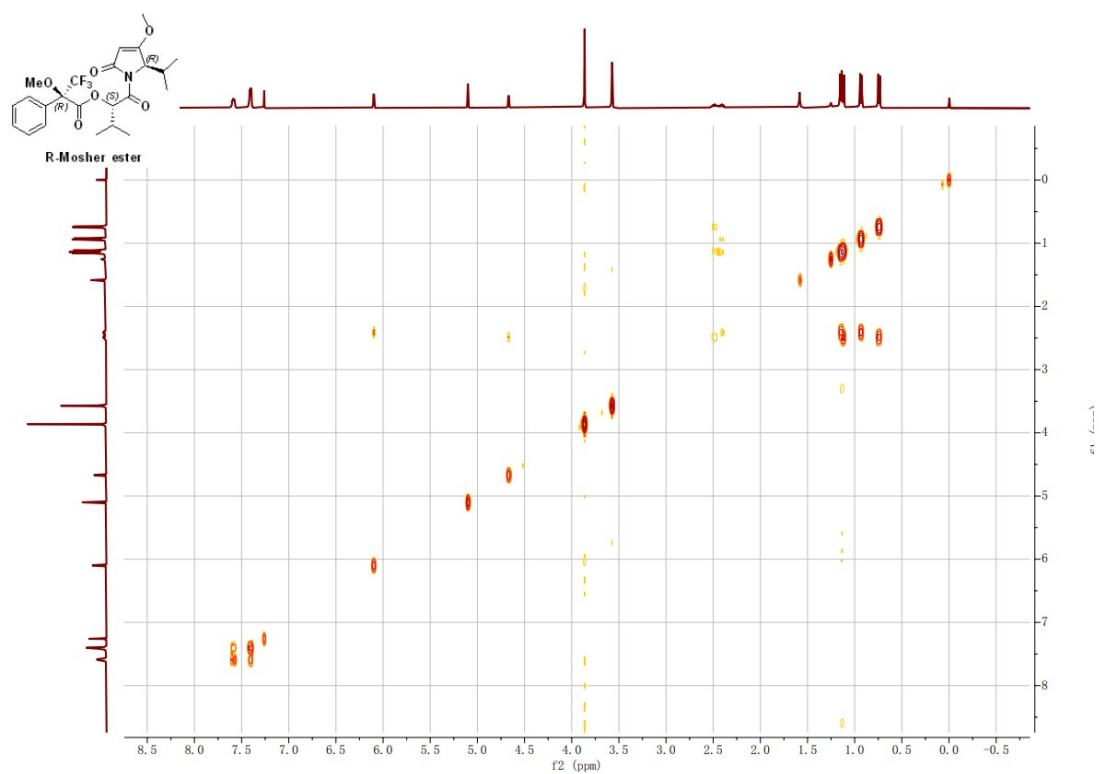

# HSQC of *R*-Mosher ester

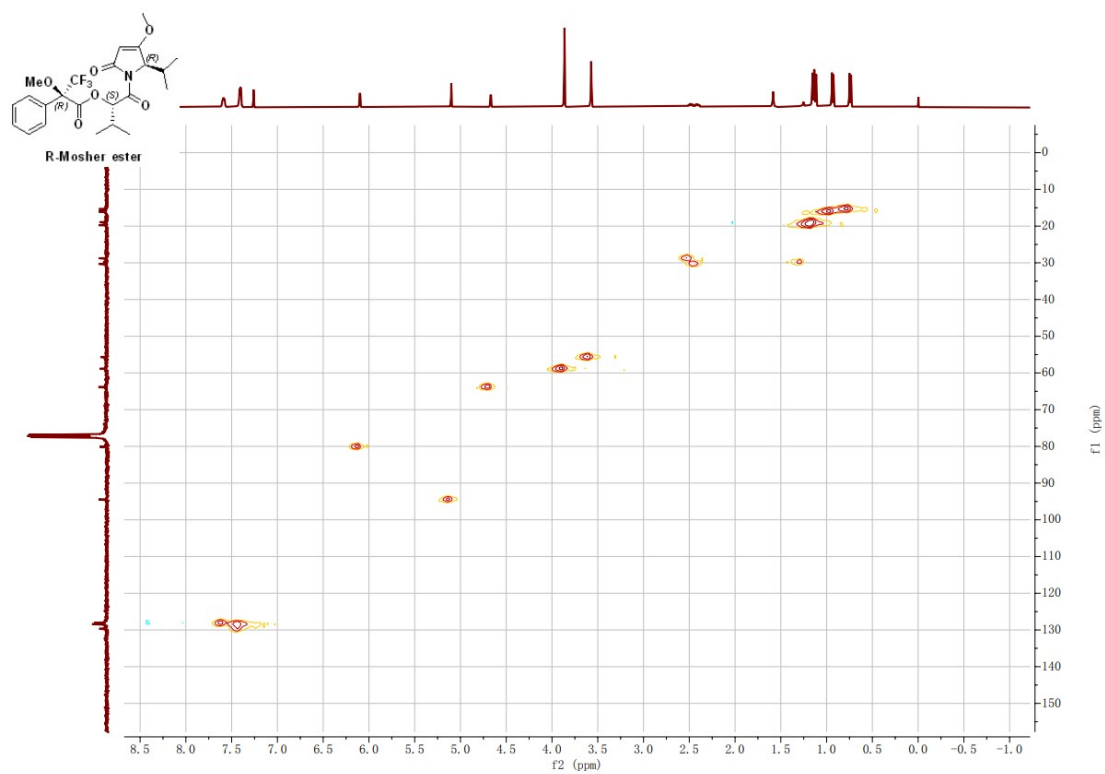

# HMBC of *R*-Mosher ester

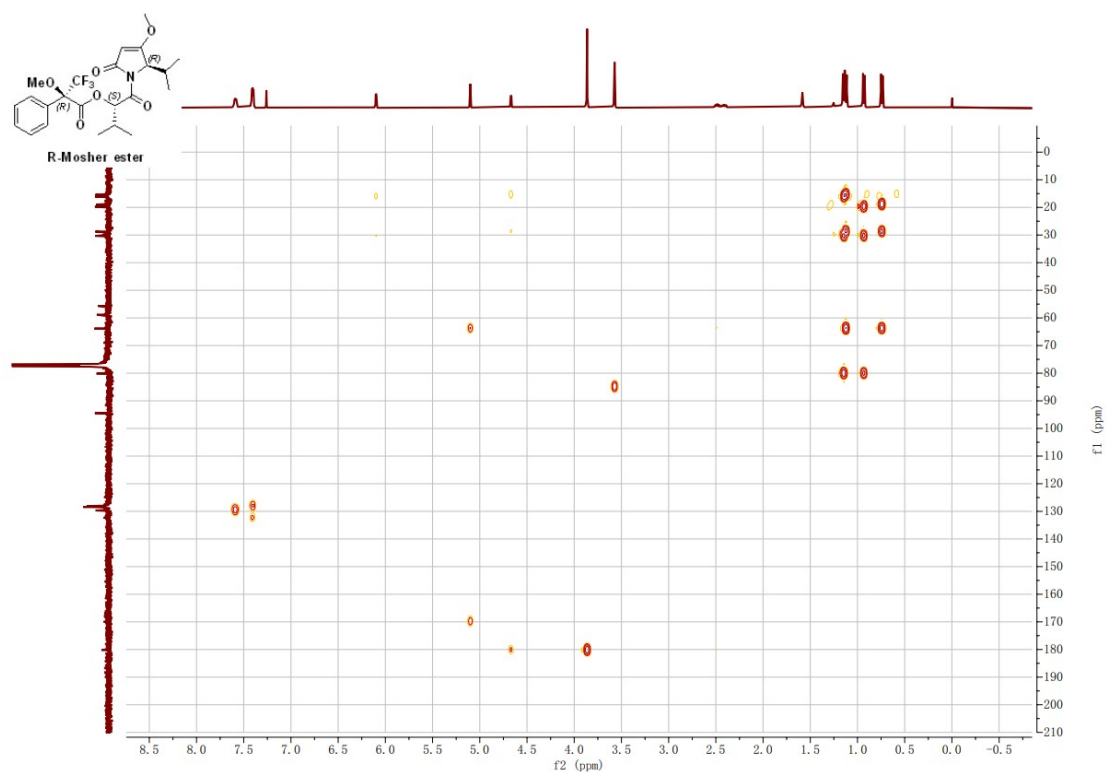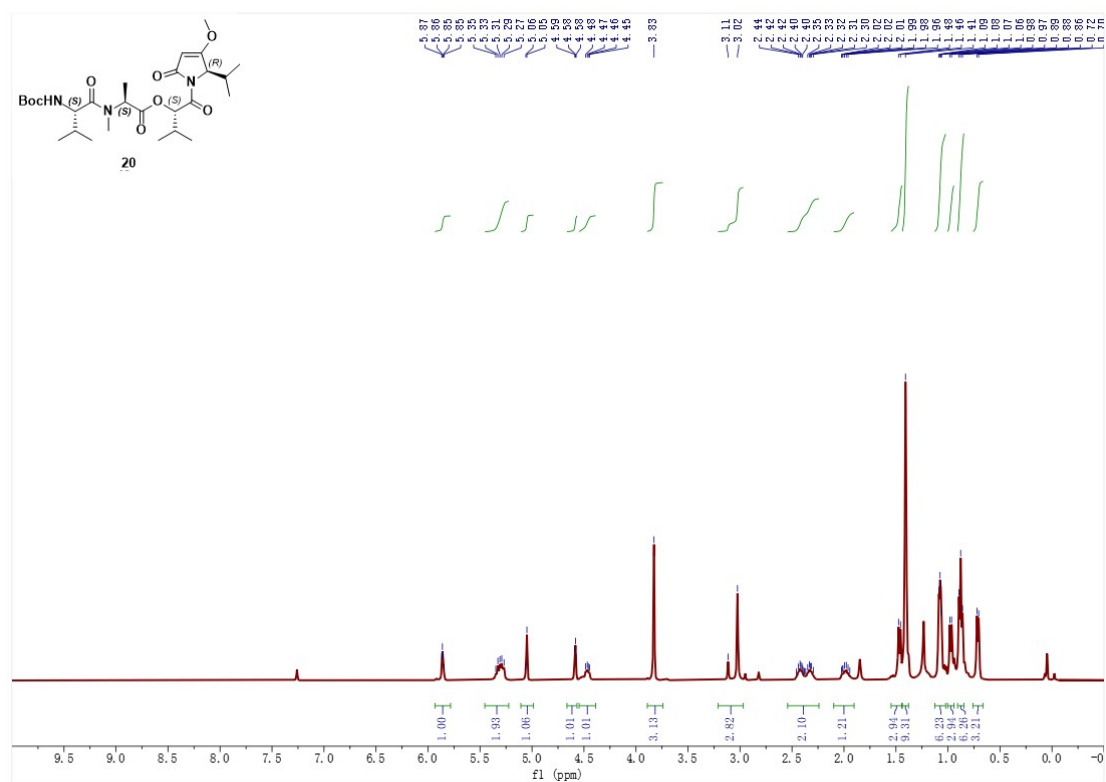

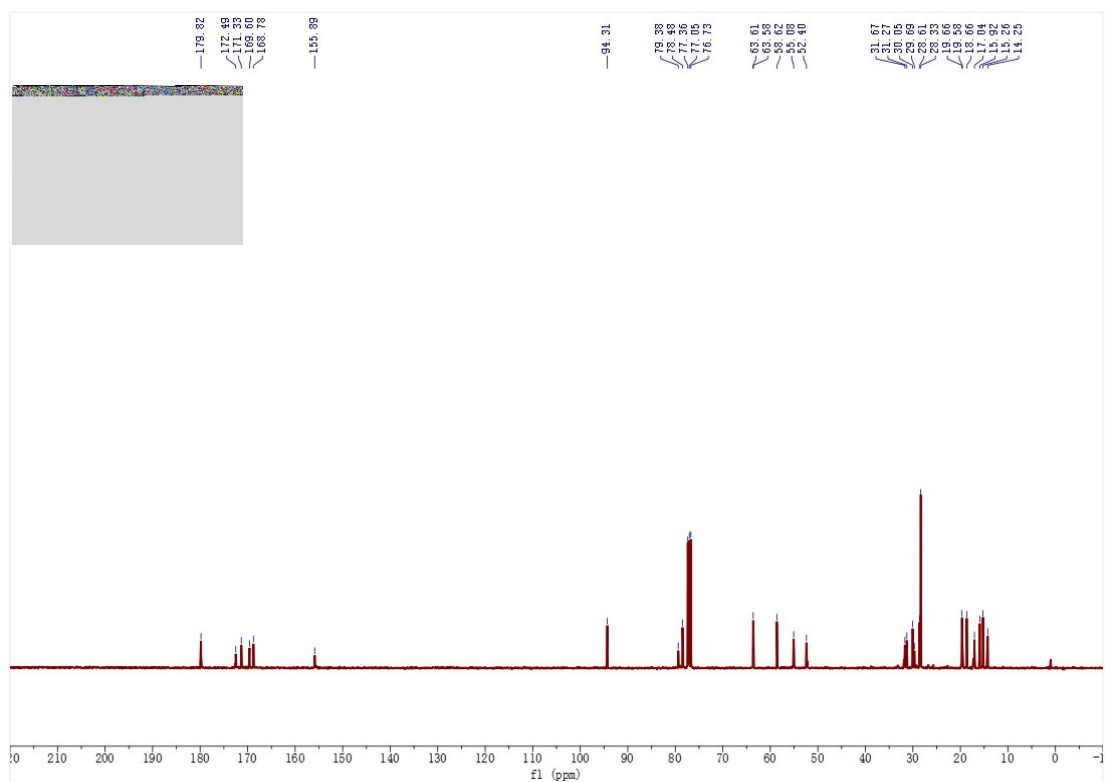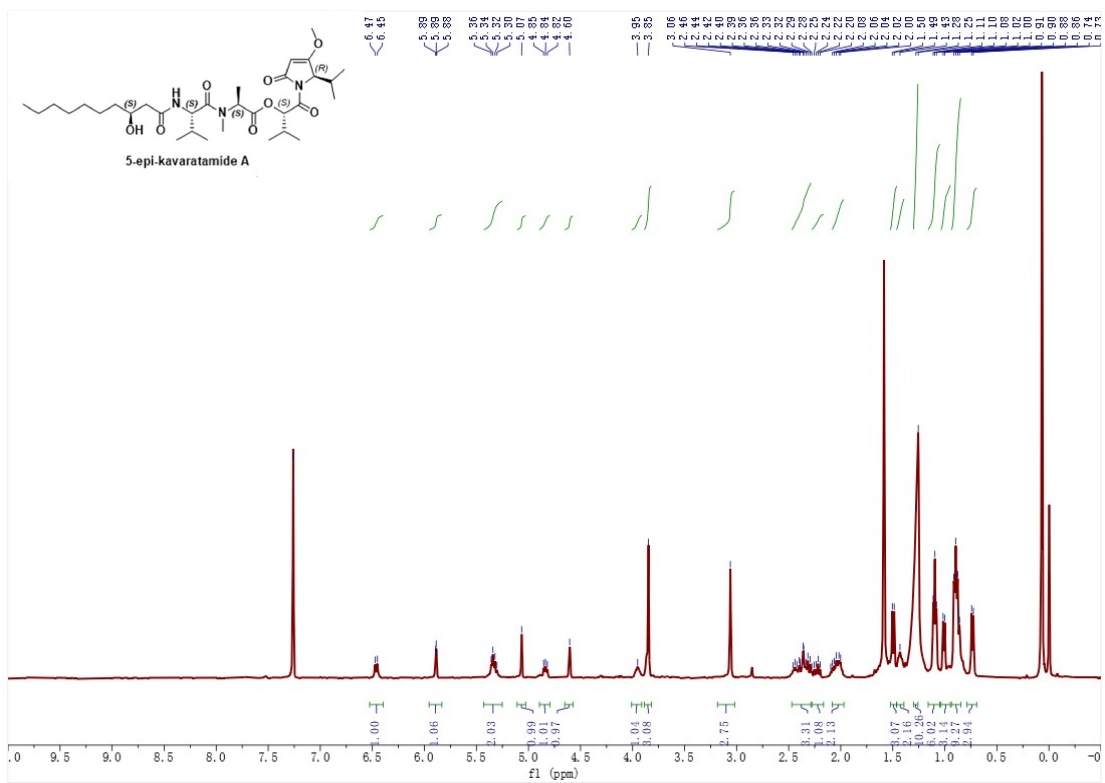



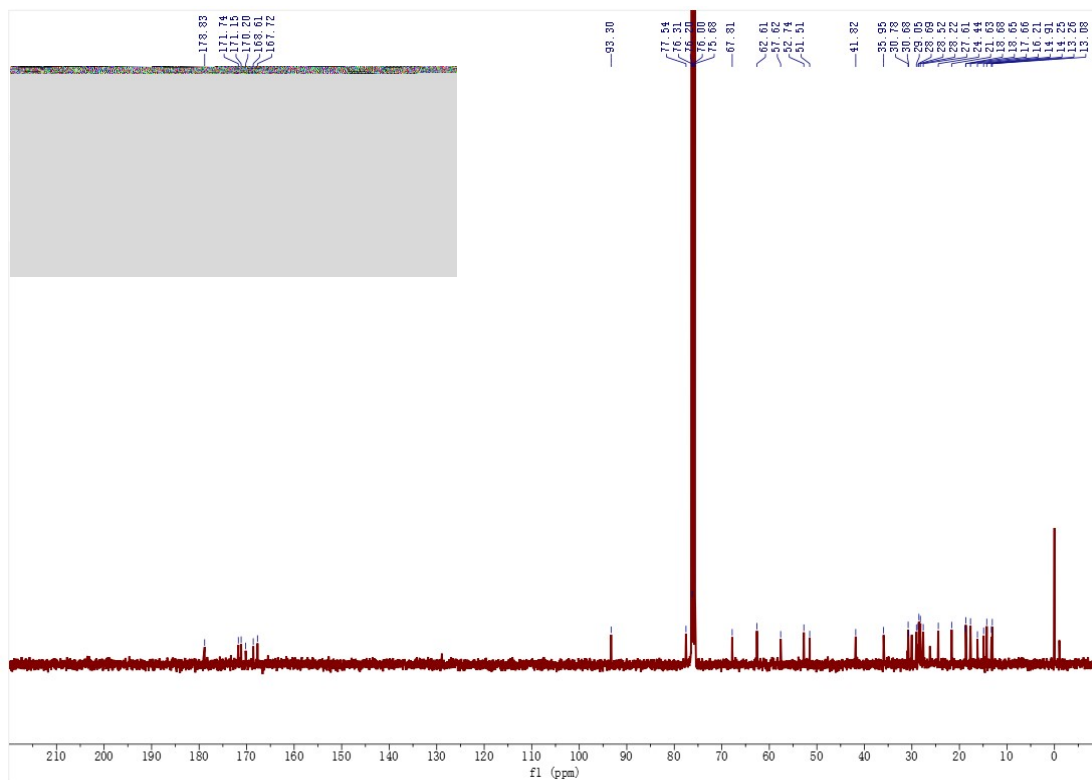

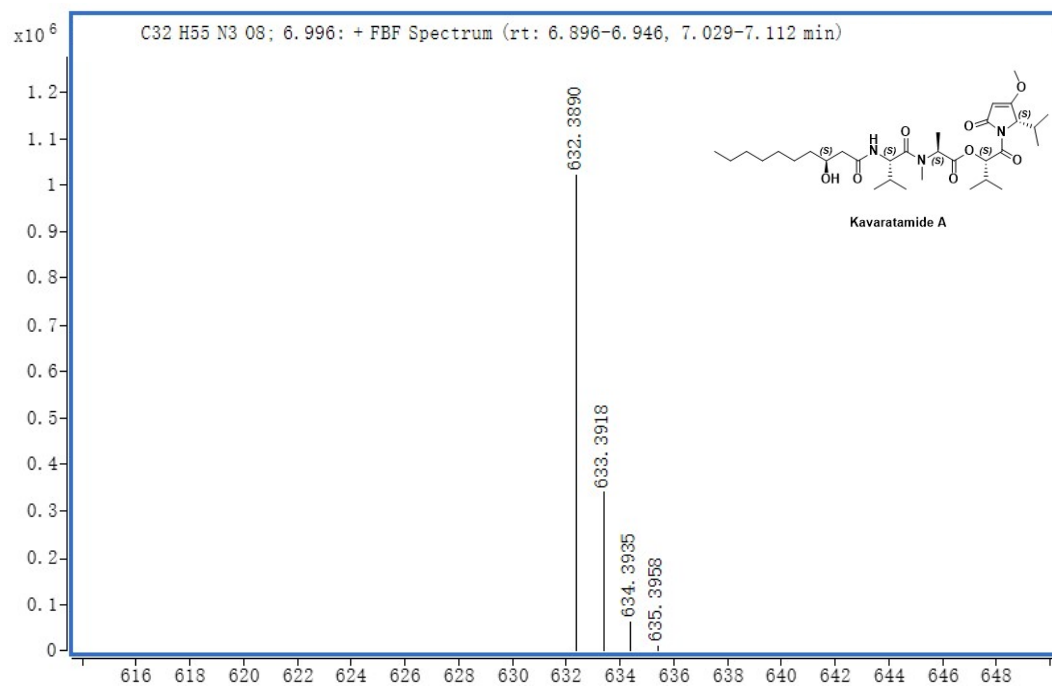

Supplement: d4ob01409j1.pdf [file d4ob01409j1.pdf]
